# Supplementary material for: CPEB2 m6A methylation regulates blood–tumor barrier permeability by regulating splicing factor SRSF5 stability
Source: PubMed Central journal article supplement (PMC9445078; doi:10.1038/s42003-022-03878-9), 2022-09-05

# Supplementary Information

## CPEB2 m6A Methylation Regulates Blood–Tumor Barrier Permeability

### by Regulating Splicing Factor SRSF5 Stability

**Authors:** Mengyang Zhang<sup>1,2,3</sup>, Chunqing Yang<sup>4,5,6</sup>, Xuelei Ruan<sup>1,2,3</sup>, Xiaobai Liu<sup>4,5,6</sup>, Di Wang<sup>4,5,6</sup>, Libo Liu<sup>1,2,3</sup>, Lianqi Shao<sup>1,2,3</sup>, Ping Wang<sup>1,2,3</sup>, Weiwei Dong<sup>4,5,6</sup>, Yixue Xue<sup>1,2,3\*</sup>

#### **Affiliations:**

<sup>1</sup>Department of Neurobiology, School of Life Sciences, China Medical University, Shenyang 110122, People's Republic of China;

<sup>2</sup>Key Laboratory of Cell Biology, Ministry of Public Health of China, China Medical University, Shenyang 110122, People's Republic of China;

<sup>3</sup>Key Laboratory of Medical Cell Biology, Ministry of Education of China, China Medical University, Shenyang 110122, People's Republic of China;

<sup>4</sup>Department of Neurosurgery, Shengjing Hospital of China Medical University, Shenyang 110004, People's Republic of China;

<sup>5</sup>Liaoning Research Center for Translational Medicine in Nervous System Disease, Shenyang 110004, People's Republic of China;

<sup>6</sup>Key Laboratory of Neuro-oncology in Liaoning Province, Shenyang 110004, People's Republic of China

Correspondence: Yixue Xue, Department of Neurobiology, College of Life Sciences, China Medical University, Shenyang 110122, People's Republic of China.

E-mail: xueyixue88cmu@163.com

This file includes:

Supplementary Figures 1-2

Supplementary Methods

Supplementary Tables 1-4

Uncropped original western blots

## Supplementary Figures

**Figure S1. METTL3 was highly expressed in glioma tissues and GECs**

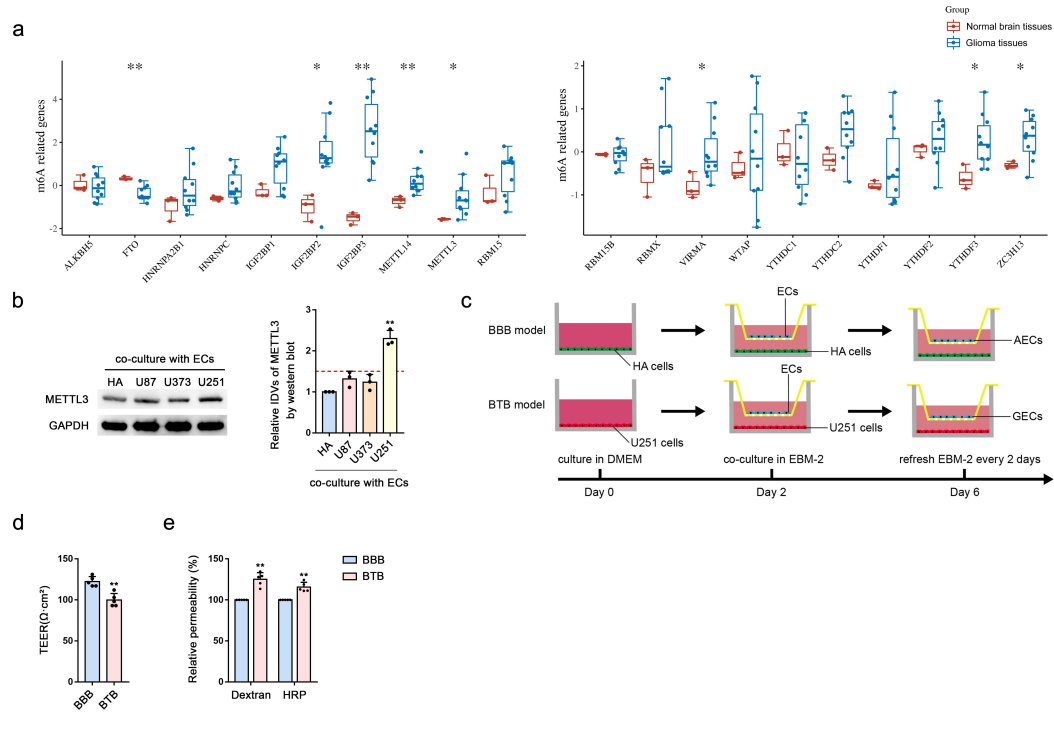

**Figure S1 (a)** The expression distribution of m6A mRNA in case and control groups, where the horizontal axis represents different mRNA, the vertical axis represents the mRNA expression distribution, where different colors represent different groups, and the upper left corner represents the significance p-value test method. Asterisks represent levels of significance \* $P < 0.05$ , \*\* $P < 0.01$ , \*\*\* $P < 0.001$ . **(b)** Relative protein levels of METTL3 in AECs (ECs co-cultured with HA) and GECs (ECs co-cultured with U87, U373 and U251 respectively) were determined by western blot assays. Data represented as mean  $\pm$  SD ( $n = 3$ ). \*\* $P < 0.01$  vs. AECs group. **(c)** A schematic showing in vitro BBB and BTB model. **(d, e)** The permeability and integrity of BBB and BTB model *in vitro* were detected by TEER values, 4-kDa FITC-dextran leakage and HRP flux. Data represented as mean  $\pm$  SD ( $n = 5$ ). \*\* $P < 0.01$  vs. BBB group.

**Figure S2. Confirmation of protein knockdowns**

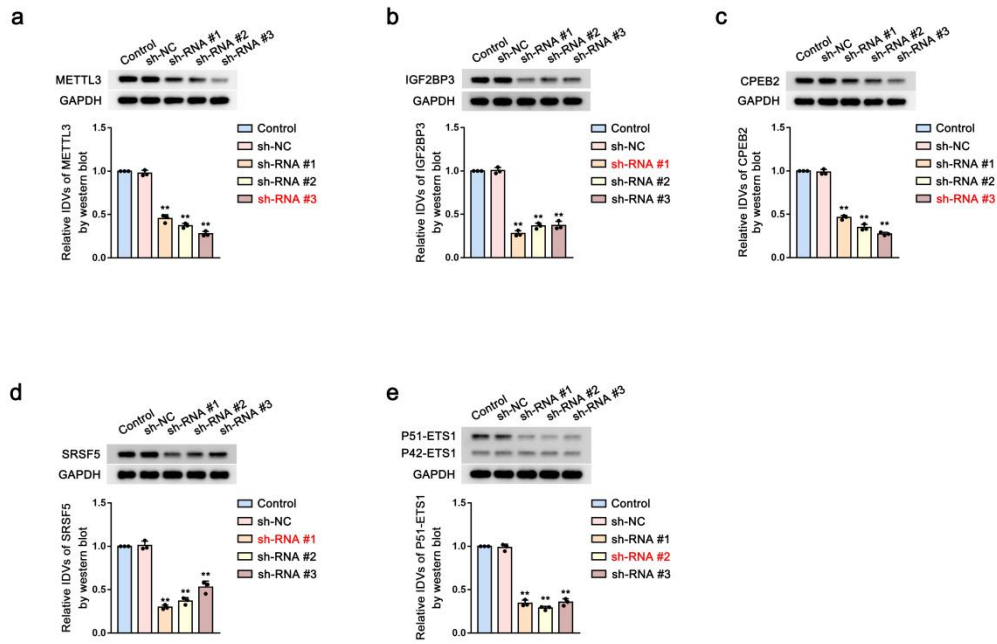

**Figure S2 (a-e)** Relative protein levels were determined by western blot assays. Data represented as mean  $\pm$  SD ( $n = 3$ ).  $**P < 0.01$  vs. sh-NC group. The selected sh-RNA plasmids were shown in red.

## **Supplementary Methods**

### **Western Blot Assays**

The total protein of the cells was extracted with RIPA buffer (Beyotime Institute of Biotechnology, Jiangsu Province) supplemented with protease inhibitors (10 mg/mL aprotinin, 10 mg/mL PMSF and 50 mM sodium orthovanadate). The protein concentration was then determined using the BCA protein assay kit (Jiangsu Beiyang Institute of Biotechnology, China). The same amount of protein was loaded for SDS-PAGE electrophoresis and then transferred to Millipore (Shanghai, China) and sealed in Tris buffer/Tween 20 (TBST) containing 5% skimmed milk powder for 2 h at room temperature. Incubate primary antibody overnight at 4°C. The membrane was washed three times with TBST and then incubated at room temperature with conjugated HRP secondary antibodies for 2 hours. ECL (enhanced chemiluminescence kit, Santa Cruz Biotechnology, Dallas, TX) detection system (Thermo Scientific, Beijing, China) was used for detection. Scan with Chemi Imager 5500 V2.03. GAPDH was used as internal reference to determine the expression level of the target protein. Antibody used are provided in Supplementary Table 3.

### **RNA Immunoprecipitation (RIP) Assay**

Whole cell lysates from different groups were collected and incubated with magnetic bead RIP buffer containing antibody overnight. The negative control group was incubated with normal mouse IgG (Millipore). Samples were incubated with proteinase K buffer to isolate immunoprecipitated RNA. The RNA concentration was measured using a spectrophotometer (NanoDrop, Thermo Scientific), and the RNA quality was evaluated using a bioanalyzer

(Agilent, Santa Clara, CA, USA). Then purified and reverse transcribed the RNA, detect RNA enrichment by qRT-PCR.

### **RNA Pull-down Assays**

RNA pull-down assays were performed using Pierce Magnetic Magnetic protein pull-down kit (Thermo Fisher) according to the manufacturer's instructions. The retrieved protein was analyzed by western blot with GAPDH as the control.

### **ChIP Assays**

ChIP assays were performed using the Simple Chip Enzymatic Chromatin IP kit (Cell Signaling Technology, Danvers, MA, USA) according to the manufacturer's instructions. GECs were crosslinked with EBM-2 containing 1% formaldehyde for 10 minutes, and incubated with glycine at room temperature for 5 minutes to stop the reaction crosslinking. Add PMSF containing lysate to the cells in the dish to fully lyse. The chromatin in the lysed cells is digested with nuclease. The immunoprecipitation was incubated with 2  $\mu$ g P51-ETS1 antibody (Santa, USA). Protein G agarose beads were subjected to a cross-linking reaction with their DNA while 2% of the lysate was used as a positive control Input. Add 5 mol/L NaCl and proteinase K to the DNA cross-linking solution to purify the DNA. The purified DNA was used for PCR amplification to verify the binding of P51-ETS1 to the promoter regions of ZO-1, occludin, and claudin-5. Primers used for ChIP PCR are shown in Supplementary Table 4.

## **Orthotopic Brain Glioblastoma Xenograft**

Female 8-week-old nude mice were purchased from HFK Bioscience (Beijing, China). U251-LUC cells stably expressing the indicated luciferase constructs ( $10^6$  cells/mouse) were injected into the caudate nucleus of the right brain hemisphere of nude mice. Nude mice were anesthetized by intraperitoneal injection of 0.8% sodium pentobarbital ( $20 \text{ mL} \cdot \text{kg}^{-1}$ ), and their heads were fixed on the brain stereotaxic device in the prone position. After disinfecting the skin on the top of the head with 75% ethanol, a vertical incision was made before the eye split at the skull midline to expose the bregma. The inoculation site was 2 mm lateral to the sagittal suture and 1 mm anterior to the bregma. A 1-mm-diameter animal skull drill was used to carefully drill through the skull and a microinjector to inoculate  $5 \mu\text{L}$  tumor cell suspension entering the white matter area vertically through the hole. The needle was inserted to a depth of 4 mm from the needle tip to the skull surface. Before injection, the needle was slightly retracted by approximately 1 mm, and the tumor cell suspension was slowly injected at a  $0.5\text{-}\mu\text{L} \cdot \text{min}^{-1}$  injection rate; the needle was kept inside the skull for 3 minutes. Then, it was slowly pulled out, the bone hole sealed with bone wax, the surgical field rinsed with saline, and the scalp sutured and disinfected with iodine. After the operation, the nude mice were placed on a constant temperature plate at  $37^\circ\text{C}$  for heat preservation and then returned to the cage after awakening. No anti-infectious treatment was required after the operation. The life status of mice was observed every day, including mental diet and physical activity, among other parameters. Recombinant AAV2/9 was used to repress gene expression in mice cerebral microvascular ECs. Short-hairpin (sh)RNA sequences were ligated into pAKD-CMV-bGlobin-eGFP-H1-shRNA (Obio Technology, Shanghai, China). The sequences

are shown in Supplementary Table 2.



**Supplementary Table 1.** Primers used for qRT-PCR

| Gene    | Sequence (5'→3') or Assay ID                              |
|---------|-----------------------------------------------------------|
| METTL3  | F: CTTCAGCAGTTCCTGAATTAGC<br>R: ATGTTAAGGCCAGATCAGAGAG    |
| METTL14 | F: ACCAAAATCGCCTCCTCCCAAATC<br>R: AGCCACCTCTTTCTCCTCGGAAG |
| IGF2BP3 | F: GAGGCGCTTTCAGGTAATAATAG<br>R: AATGAGGCGGGATATTTCTGTAT  |
| KLF6    | F:CTGCAGGAAAGTTTACACCAA<br>R:ACTCATCACTTCTTGCAAACG        |
| CPEB2   | F: GTTCTGCGGCGAGGCGTATG<br>R: CAACGGTGGTGGCGACAGTG        |
| TMED9   | F:GAGACCATGGTCATAGGAAACT<br>R:TATGGGAAGTGAAAGTGAACCT      |
| SRSF1   | F: GTTCTACAAATACGGCGCTATC<br>R: GACGGTACCCATCGTAATCATA    |
| SRSF2   | F: ACAACCTGACCTACCGCACCTC<br>R: TGAAAGCGAACGAAGGCGAAGC    |
| SRSF5   | F: CAGACCTCGAAATGATAGACGA<br>R: CCAGCTGACTCTTGAGGATAAA    |
| SRSF4   | F: CTCGCACAGAGTACAGACTTAT<br>R: CTTGTGAGCATCTGCATAAGTC    |
| SRSF6   | F: CTAAGATGACTGCCTTTCCTGA<br>R: TAAGGTCAGCCAAAGGGTCATA    |
| SRSF7   | F: AGAACTGTATGGATTGCGAGAA<br>R: CACAAATCACCTTCCATCCAG     |
| MYBL2   | F: TCAGAAGTACTCCATGGACAAC<br>R: GTCCTCGATGATGAGTTCGAT     |
| AR      | F: CTACATCAAGGAACTCGATCGT<br>R: CATGTGTGACTTGATTAGCAGG    |
| ETS1    | F: TTGAAAGCATAGAGAGCTACGA<br>R: CTCTGAGTCGAAGCTGTCATAG    |
| BRD3    | F: ATGCAGAATGTGGTGGTGAAG<br>R: ATAATCCGGCAGGTTCAATTTG     |
| THAP11  | F: ATCGATCTCACAGTGCAAGTG<br>R: TGACGACAAGGAGTACGAATG      |
| GAPDH   | F: GGTGAAGGTCGGAGTCAACG<br>R: CCATGTAGTTGAGGTCAATGAAG     |
| EGFP    | F: CCTCGTGACCACCTGACCTAC<br>R: TTGCCGTCGTCTTGAAGAAGATG    |

**Supplementary Table 2.** shRNA and plasmid sequences

| Gene     | Sequence                    |
|----------|-----------------------------|
| METTL3   | 5'-3':GCAAGAATTCTGTGACTATGG |
| IGF2BP3  | 5'-3':GCAAAGGATTCGGAAACTTCA |
| CPEB2    | 5'-3':GTGTTCAGAACAGACAACAAT |
| SRSF5    | 5'-3':GGATATGGACGGATAAGAGAT |
| P51-ETS1 | 5'-3':GGACCGTGCTGACCTCAATAA |
| P42-ETS1 | 5'-3':GGACCAGTCGTGGCAGTGGAC |

  

| Gene      | plasmid sequences                          |
|-----------|--------------------------------------------|
| CPEB2-Wt  | CATCTTTATCAGCAGCCAAAACACTACAAGCCTCTTGTTTT  |
| CPEB2-Mut | CATCTTTATCAGCAGCCAAAACCACTACAAGCCTCTTGTTTT |

**Supplementary Table 3.** Antibodies used for western blotting (WB), RNA-binding protein immunoprecipitation (RIP)

| <b>Protein</b>   | <b>Applications</b> | <b>Antibody</b>         | <b>Origin</b> | <b>Dilution</b>             | <b>Molecular weight</b> |
|------------------|---------------------|-------------------------|---------------|-----------------------------|-------------------------|
| METTL3           | WB                  | 15073-1-AP, Proteintech | Rabbit        | 1:500                       | 64kD                    |
| IGF2BP1          | WB                  | 22803-1-AP, Proteintech | Rabbit        | 1:500                       | 65kD                    |
| IGF2BP2          | WB                  | 11601-1-AP, Proteintech | Rabbit        | 1:500                       | 66kD                    |
| IGF2BP3          | WB,IP               | 14642-1-AP, Proteintech | Rabbit        | 1:500;1 $\mu$ g per IP      | 69kD                    |
| CPEB2            | WB,IP,IF            | ab51069, Abcam          | Rabbit        | 1:500;1 $\mu$ g per IP;1:50 | 66kD                    |
| SRSF5            | WB,IP               | ab67175, Abcam          | Mouse         | 1:500;1 $\mu$ g per IP      | 65kD                    |
| P51-ETS1         | WB,IP               | sc-55581,Santa Cruz     | Mouse         | 1:500;1 $\mu$ g per IP      | 51kD                    |
| P42-ETS1         | WB                  | sc-55581,Santa Cruz     | Mouse         | 1:500                       | 42kD                    |
| GAPDH            | WB                  | 60004-1-Ig, Proteintech | Mouse         | 1:10000                     | 36kD                    |
| IgG              | RIP                 | ab18413, Abcam          | Mouse         | 1:10                        | 150kD                   |
| ZO-1             | WB,IF               | 61-7300, Thermo Fisher  | Rabbit        | 1:500;1:50                  | 220kD                   |
| Occludin         | WB,IF               | 71-1500, Thermo Fisher  | Rabbit        | 1:500;1:50                  | 59kD                    |
| Claudin-5        | WB,IF               | 35-2500, Thermo Fisher  | Mouse         | 1:500;1:50                  | 22kD                    |
| Goat anti-mouse  | WB                  | SA00001-1, Proteintech  |               | 1:10000                     |                         |
| Goat anti-rabbit | WB                  | SA00001-2, Proteintech  |               | 1:10000                     |                         |

**Supplementary Table 4.** Primers used for ChIP

| Gene           | Sequence (5'→3') or Assay ID                           |
|----------------|--------------------------------------------------------|
| ZO-1 PCR1      | F: CTACAGGTGCACACCACCAC<br>R: GTGGCTCACGCCTGTAATC      |
| ZO-1 PCR2      | F: TTGTGAGGCTGTTGGCTTACT<br>R: TCTTGGTGAGTACAGTGAGCTTT |
| occludin PCR1  | F: GTGGAAGTGTGCGCATGTAG<br>R: CCTCGACCCTCAAGTTTGTC     |
| occludin PCR2  | F: TCTGAGTCACGGGGATTTTC<br>R: GGATGTAAATGATGCCATGC     |
| claudin-5 PCR1 | F: GCACTCAGGAAAGGCAGAAG<br>R: GATGTGAGCAGCATCCAGAG     |
| claudin-5 PCR2 | F: CTA CTTGGGAGGCTGAGGTG<br>R: TTCTCTGGGTTGCCTTTTTG    |

**Full length uncropped original western blots used in the manuscript**

Figure 1f

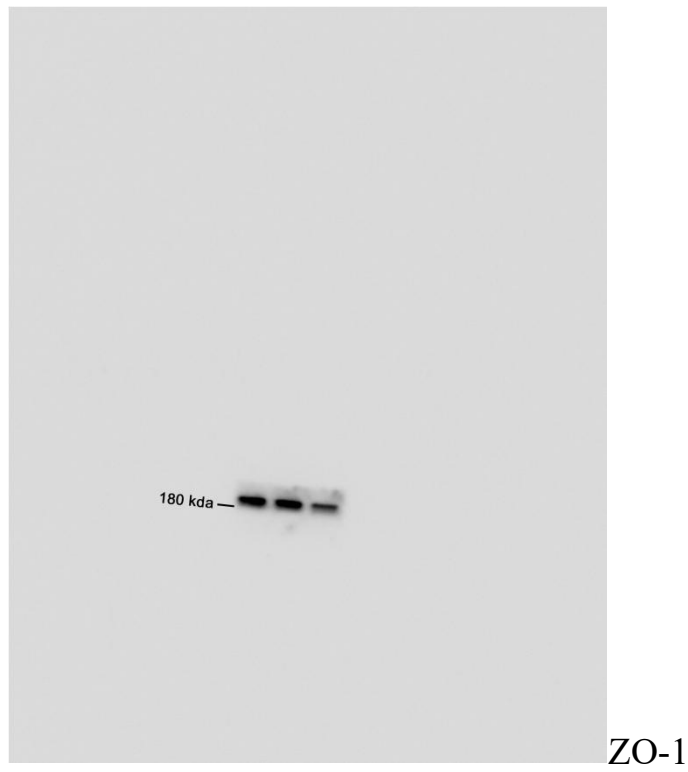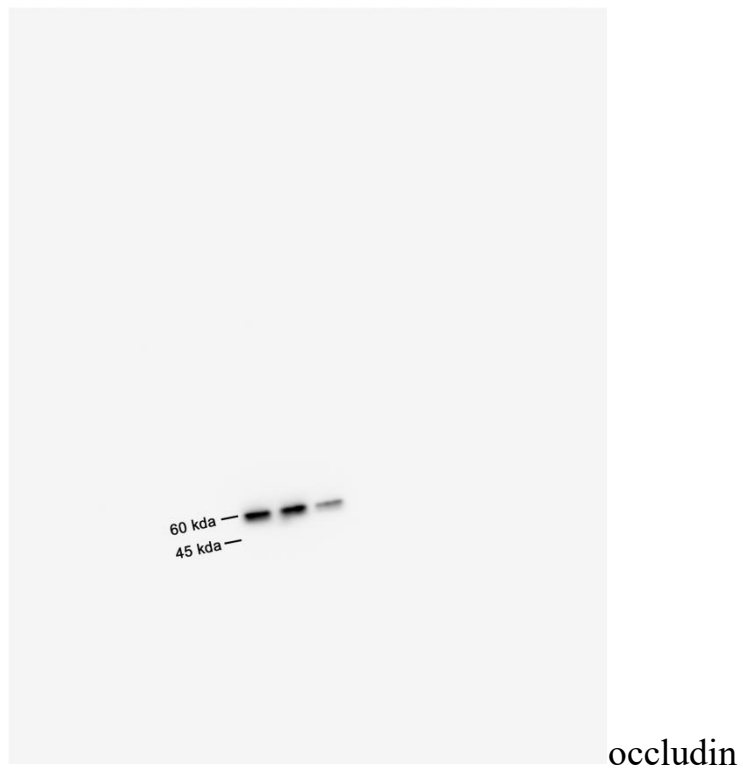

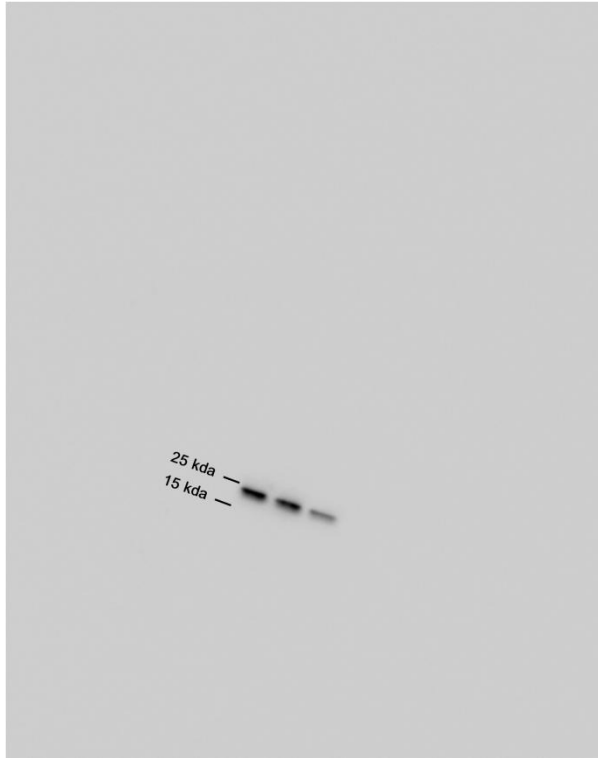

claudin-5

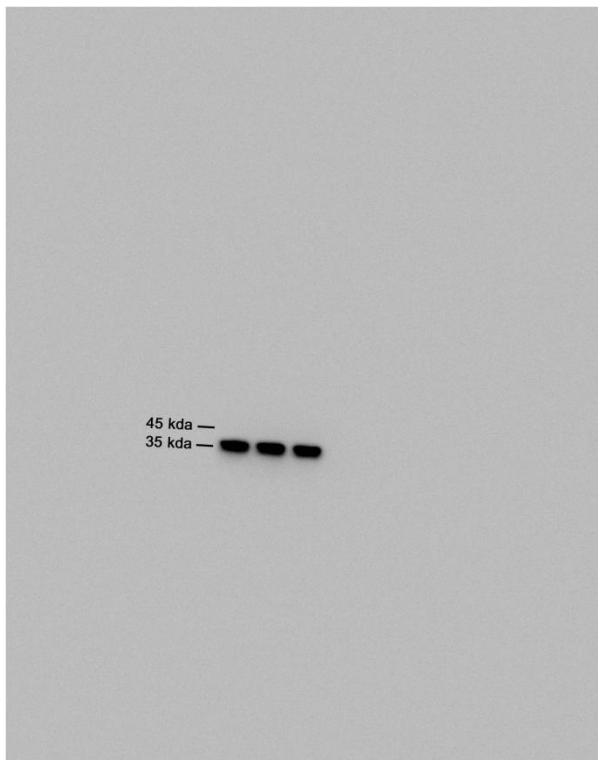

GAPDH

Figure 1h

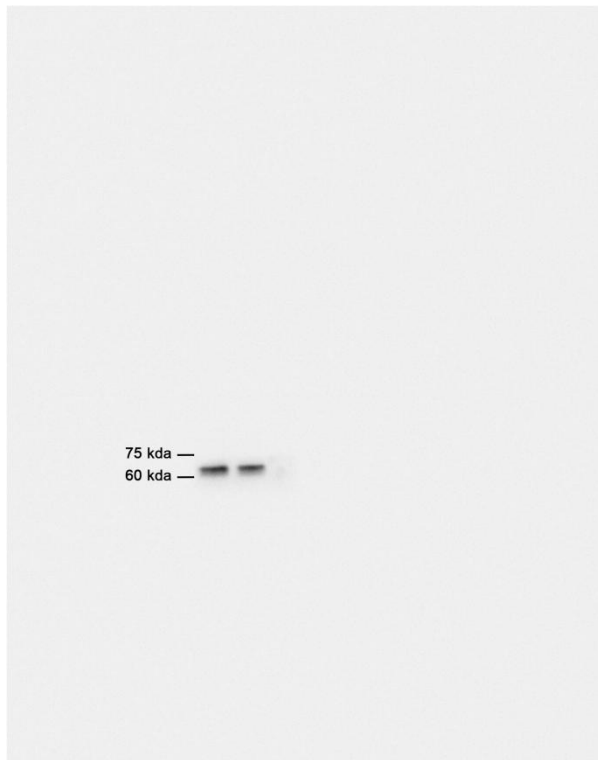

IGF2BP1

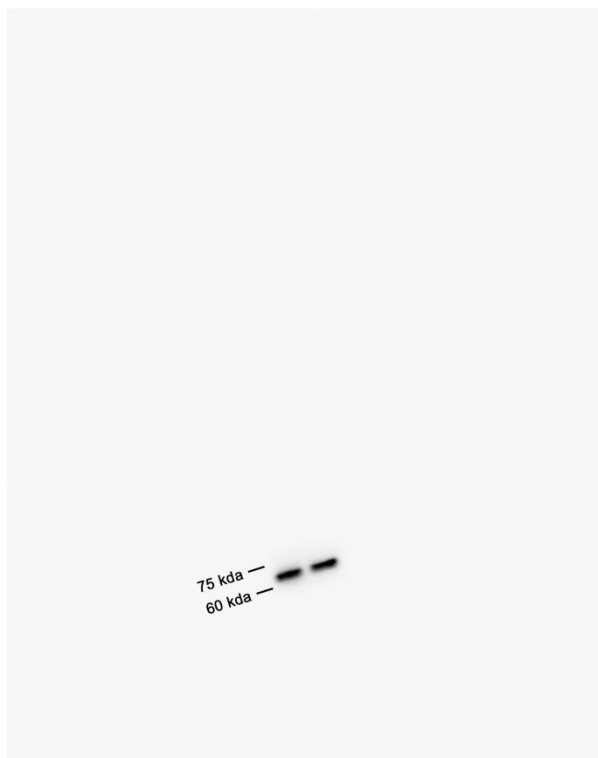

IGF2BP2

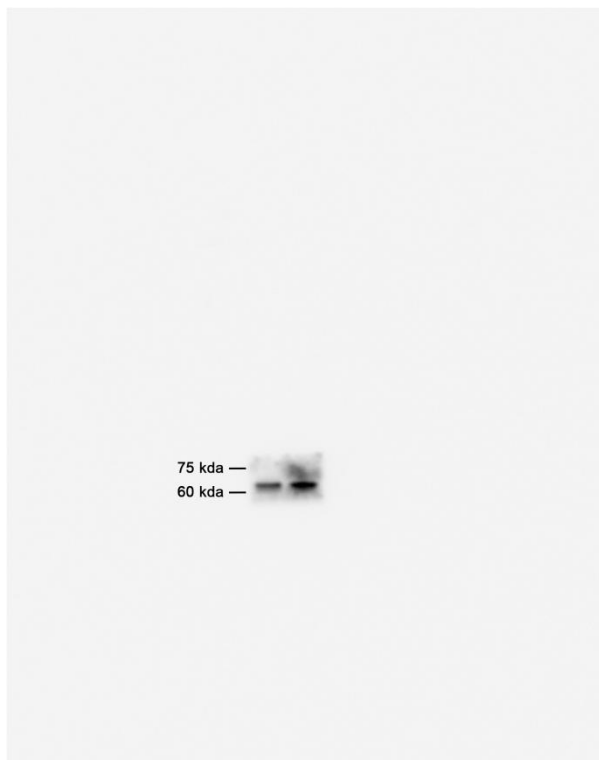

IGF2BP3

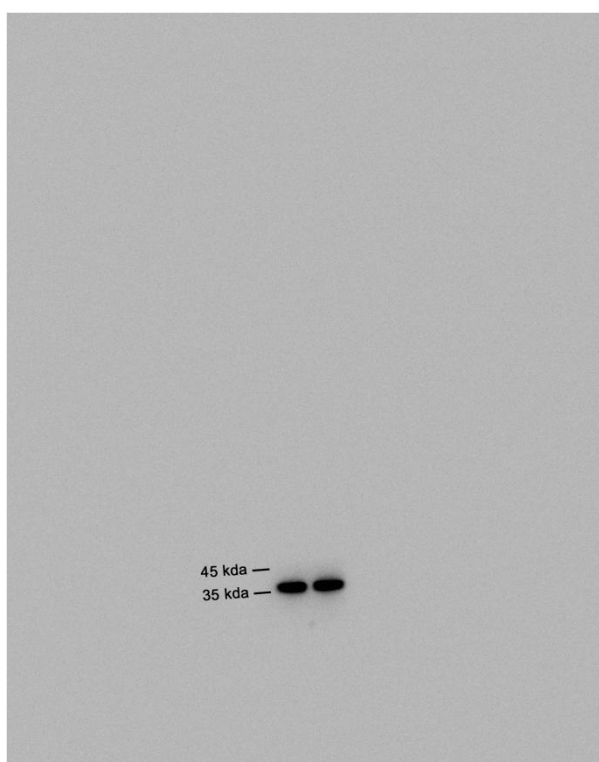

GAPDH



Figure 1k

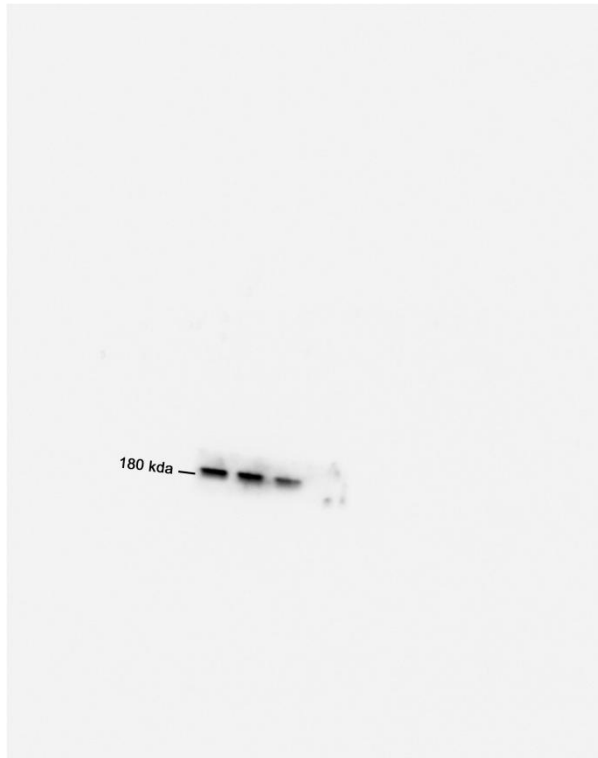

ZO-1

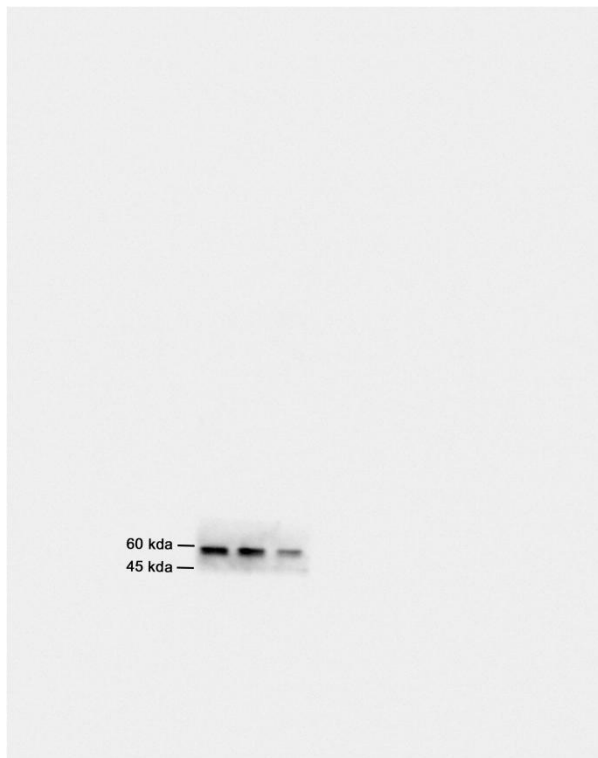

occludin

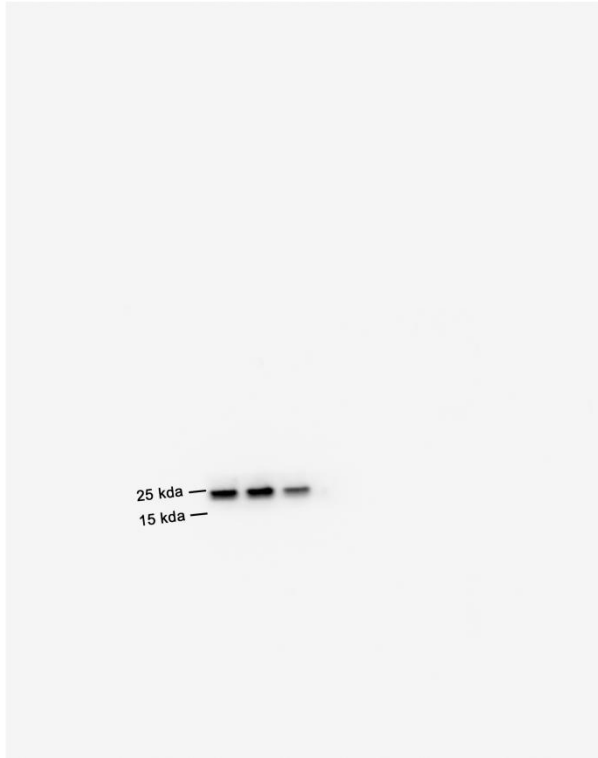

claudin-5

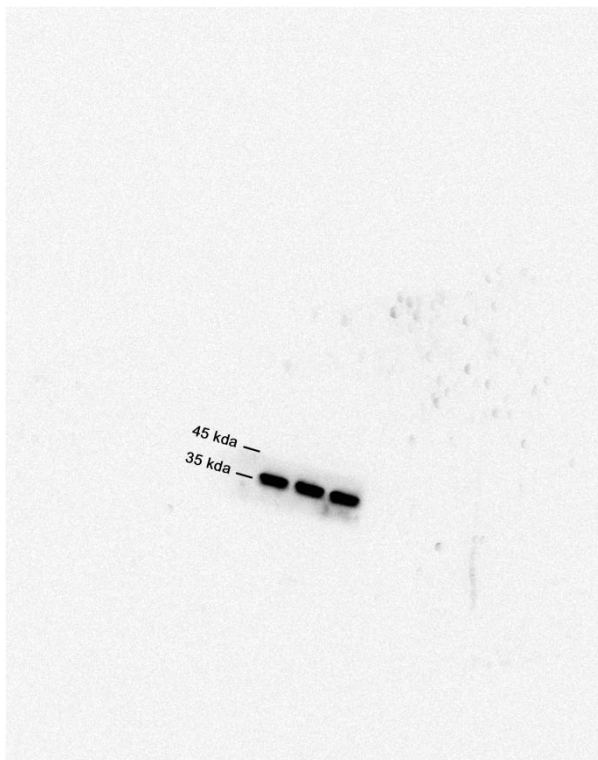

GAPDH

Figure 2h

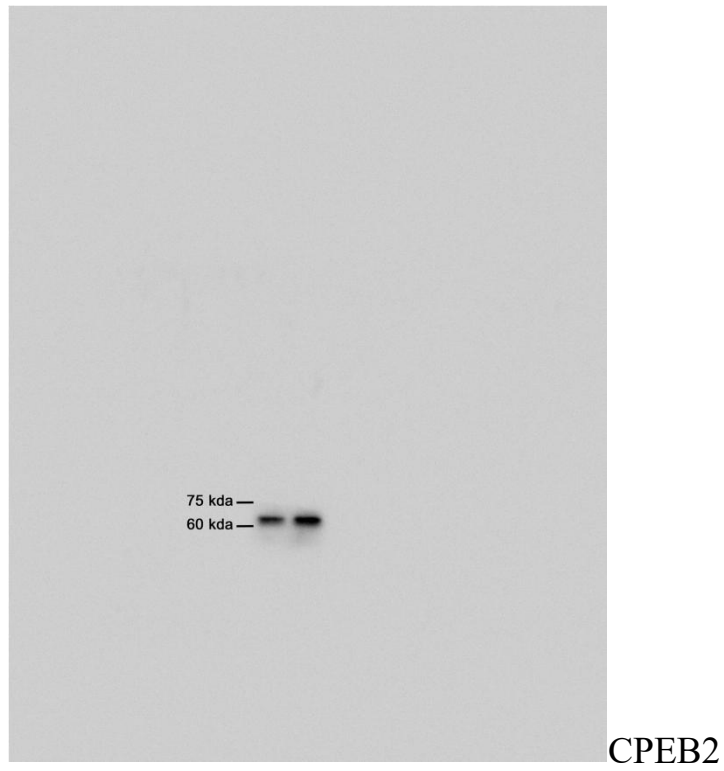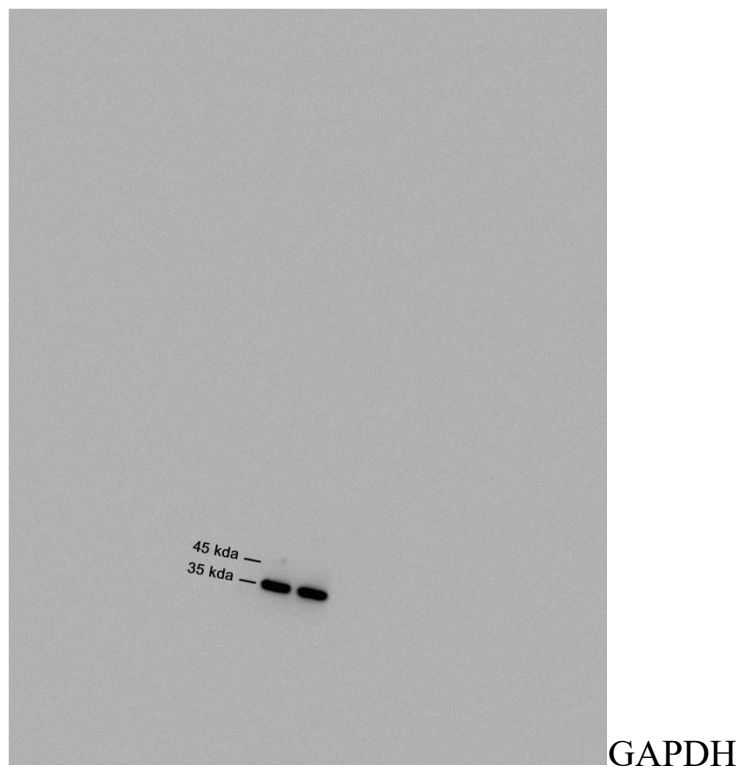

Figure 2k

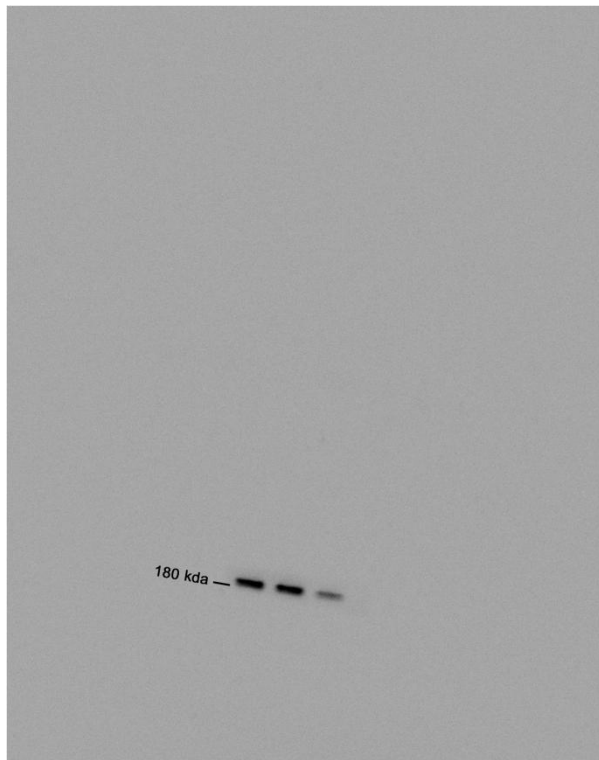

ZO-1

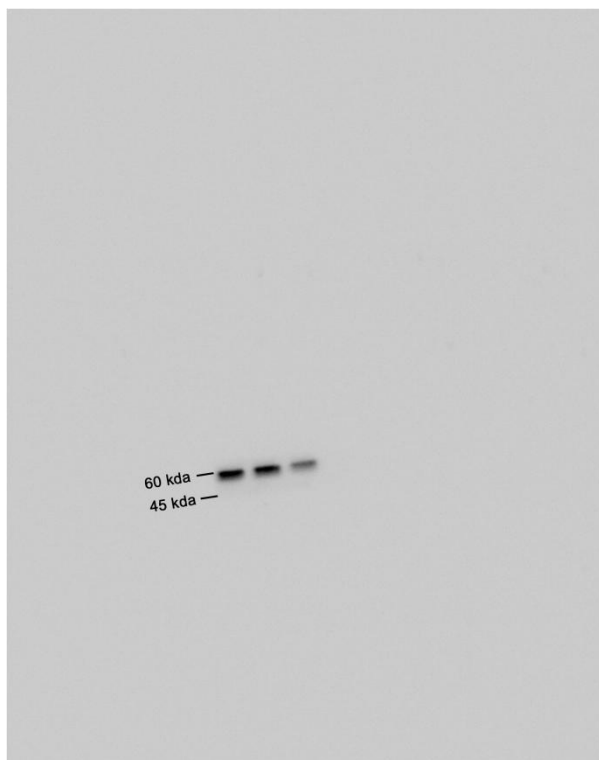

occludin

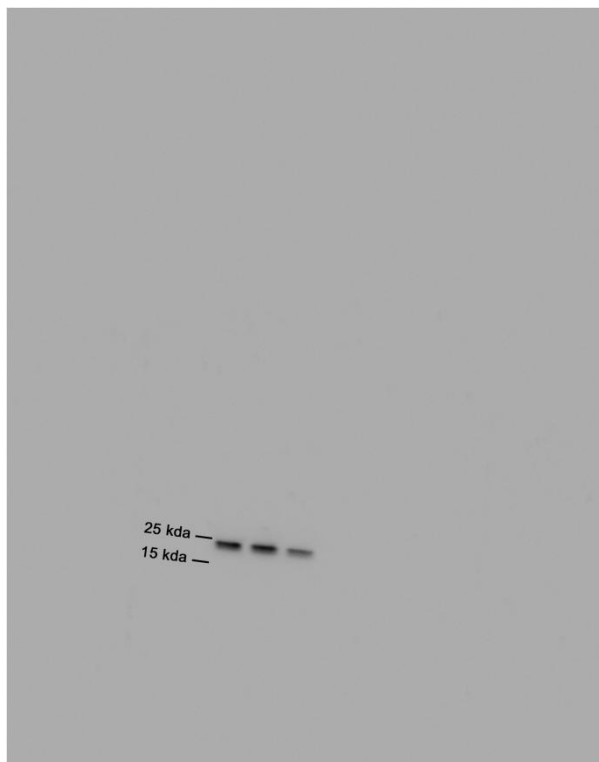

claudin-5

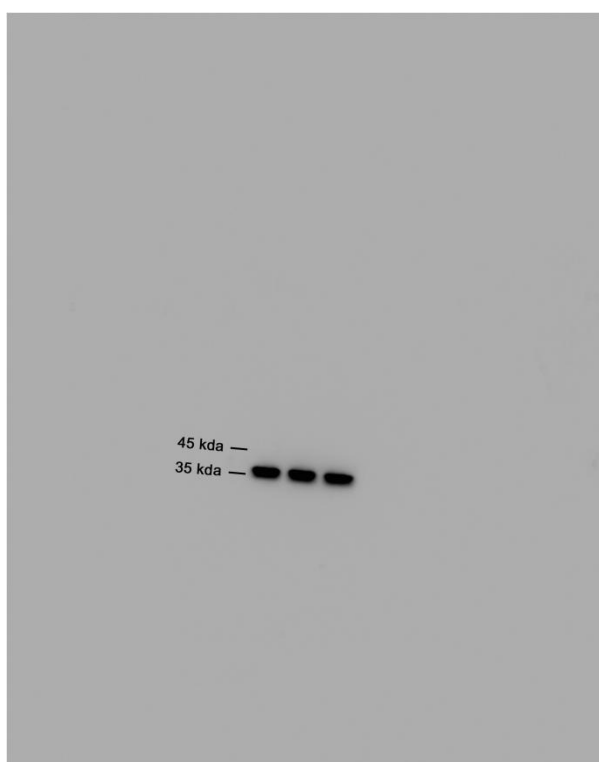

GAPDH

Figure 3n

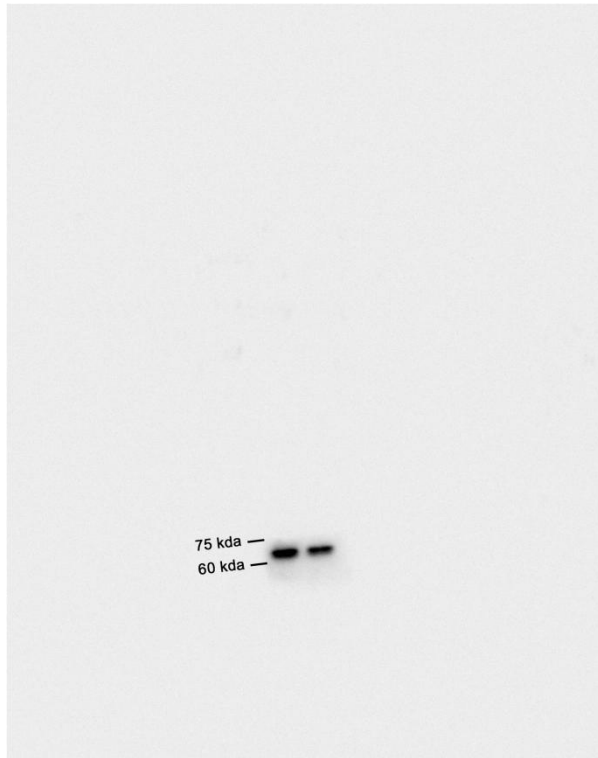

CPEB2

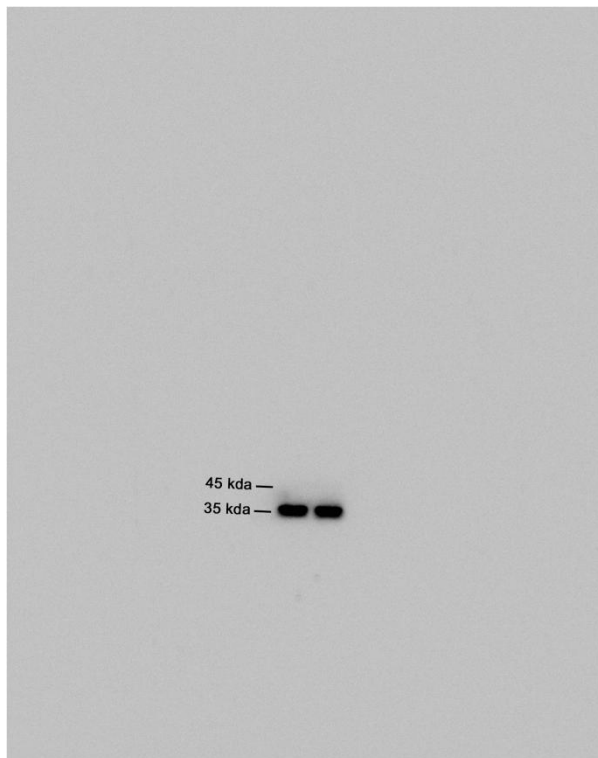

GAPDH

Figure 3q

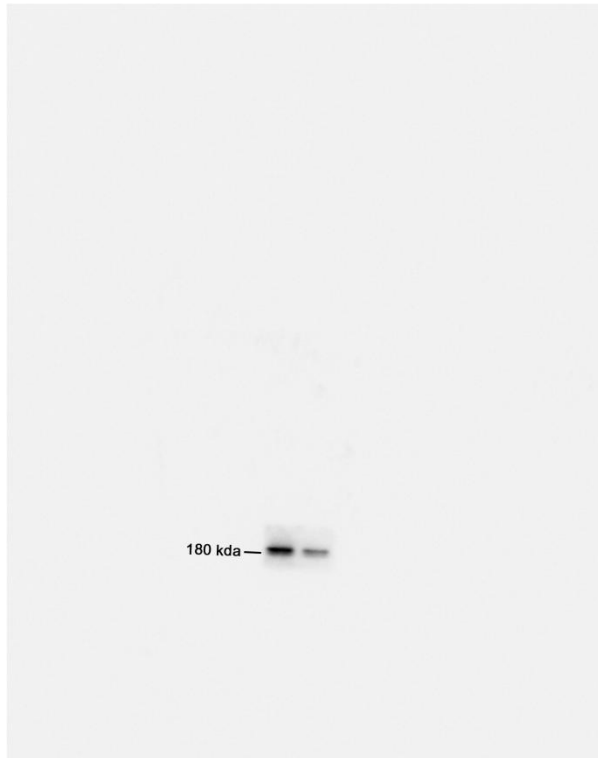

ZO-1

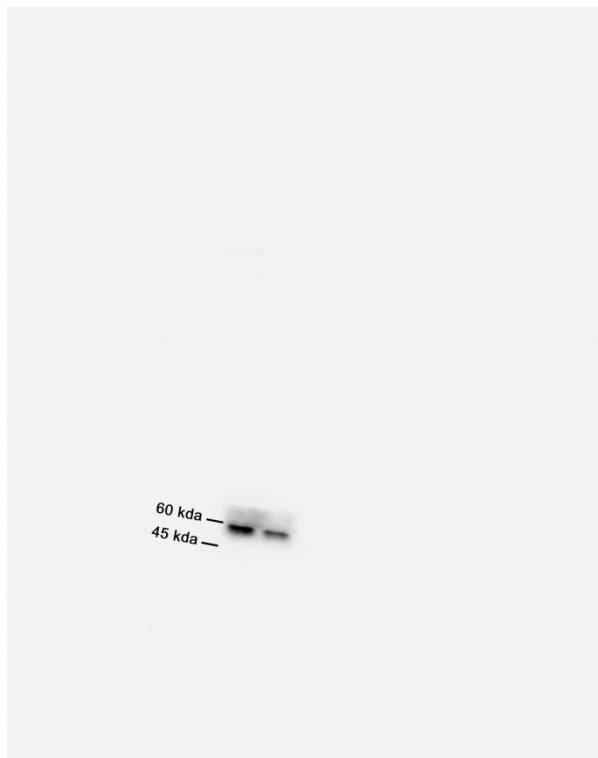

occludin

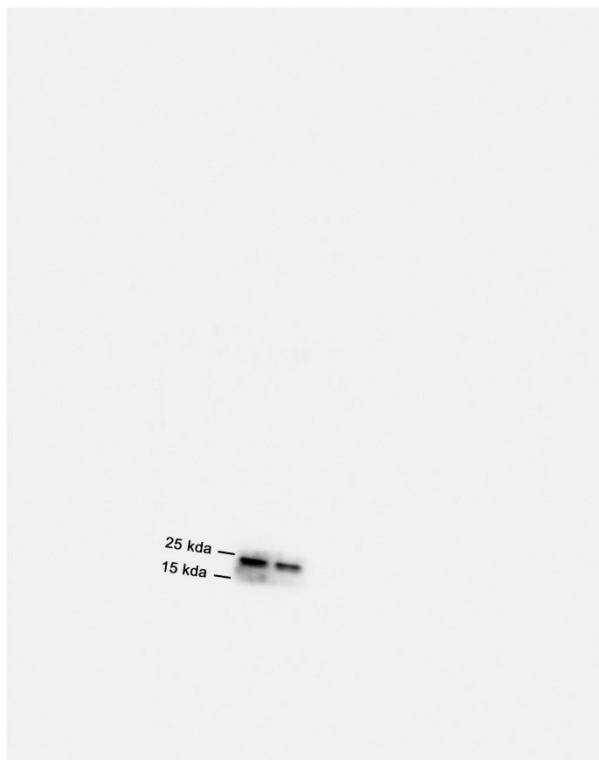

claudin-5

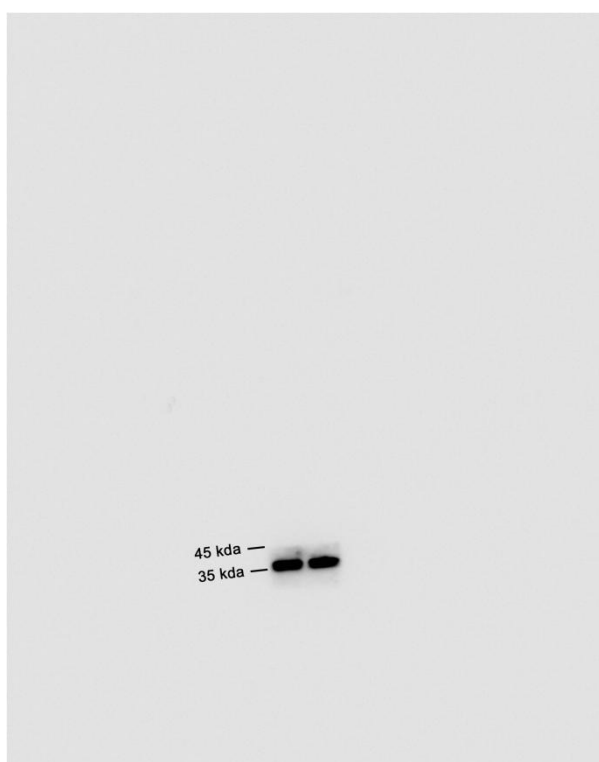

GAPDH



Figure 3u

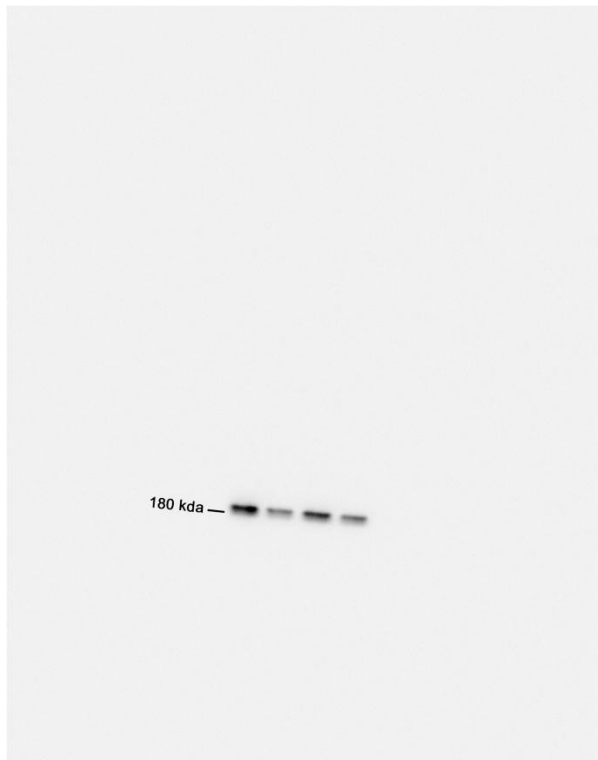

ZO-1

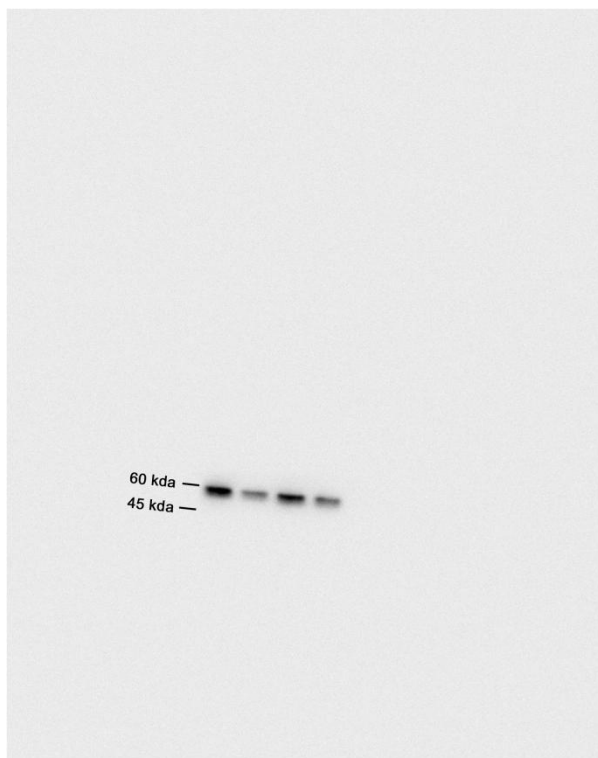

occludin

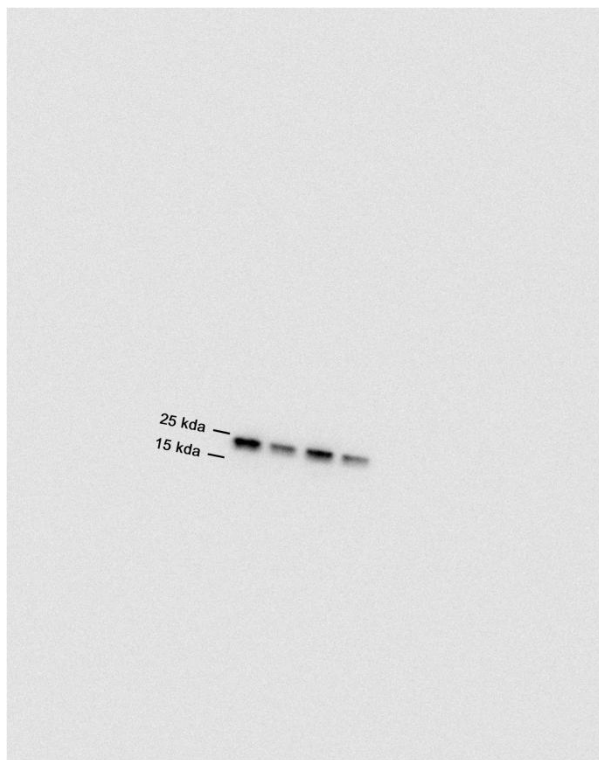

claudin-5

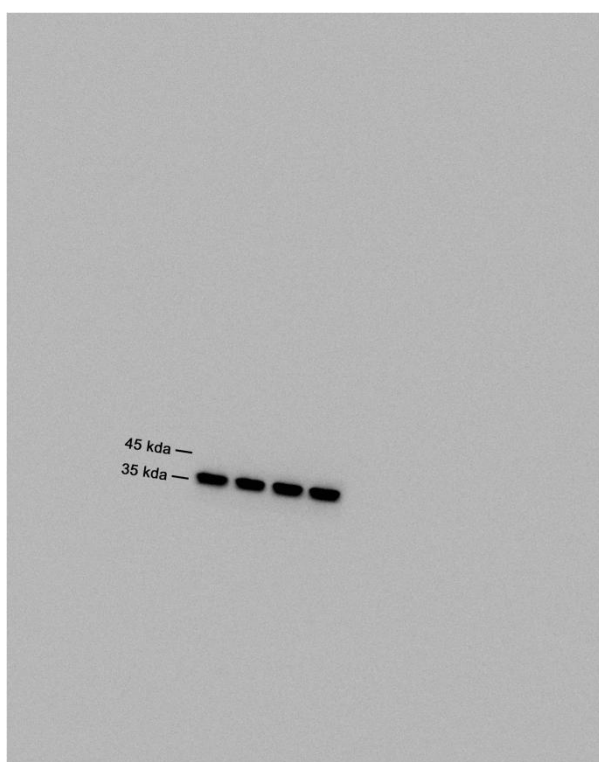

GAPDH

Figure 4e

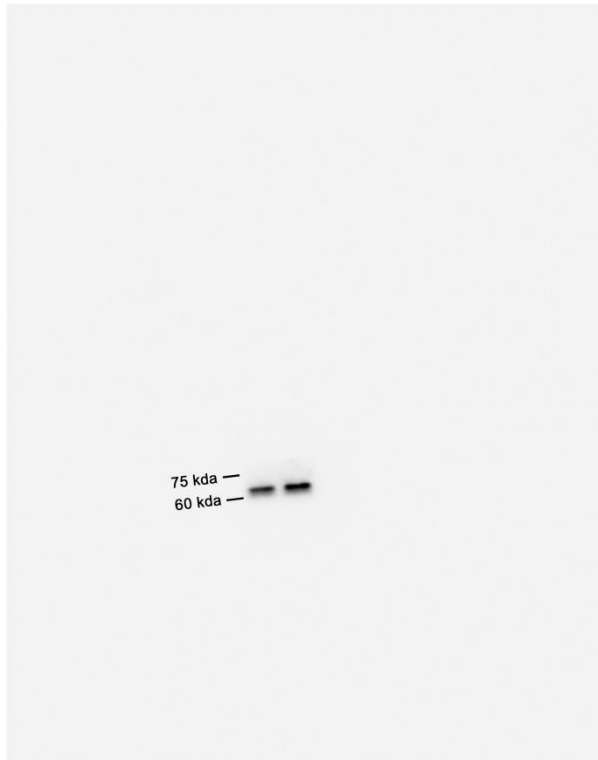

SRSF5

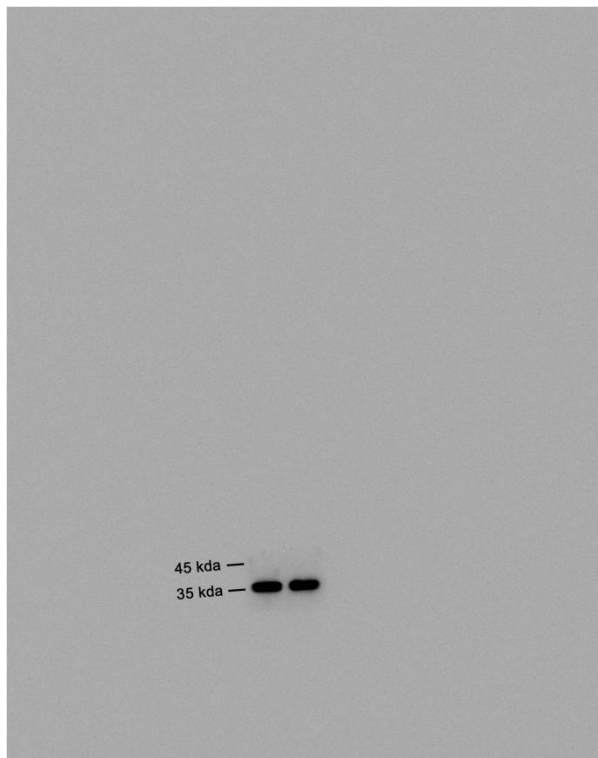

GAPDH

Figure 4h

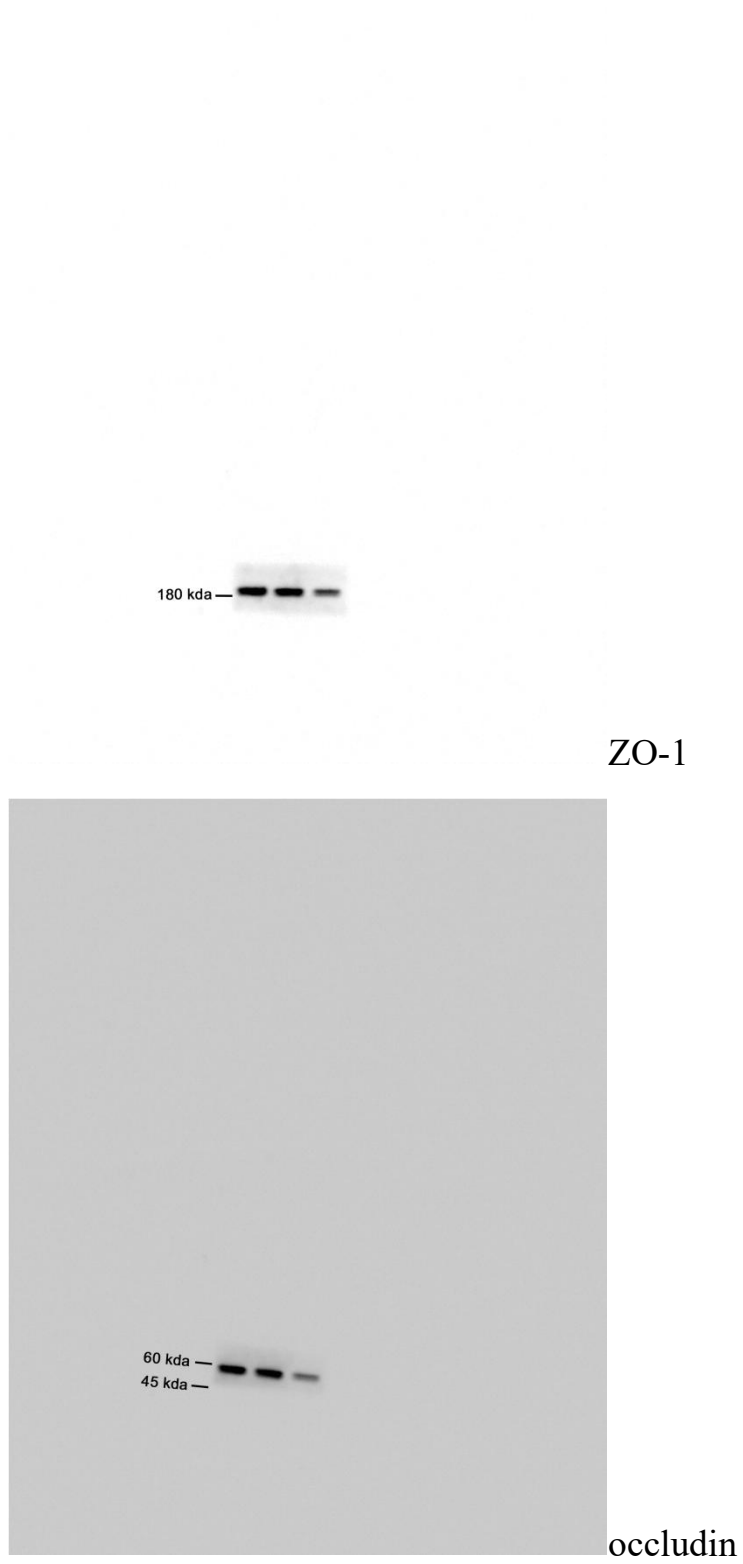

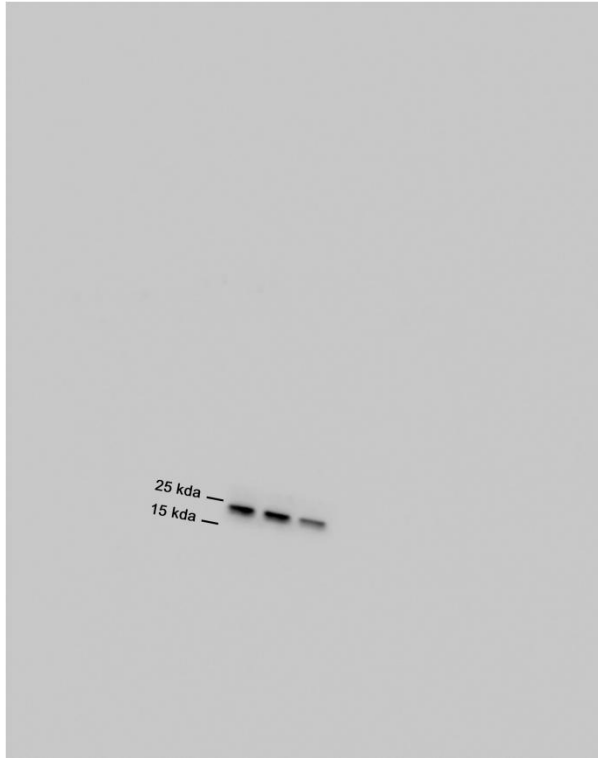

claudin-5

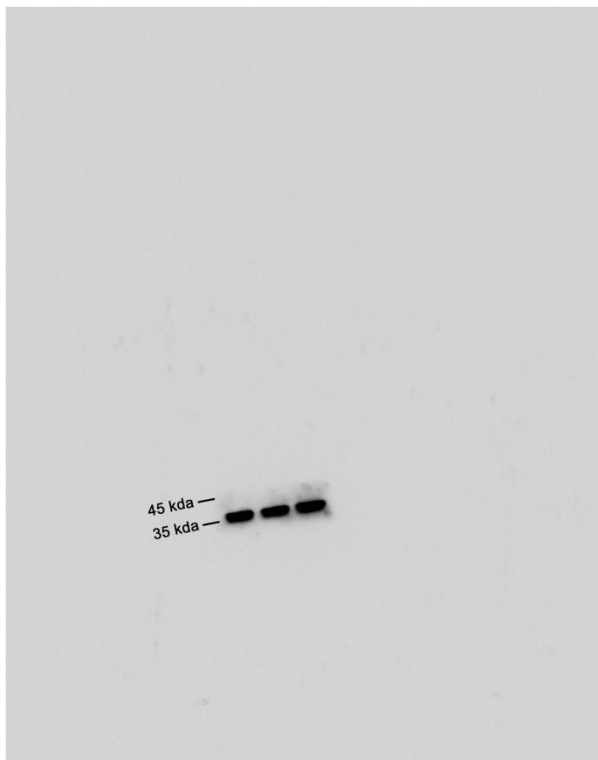

GAPDH

Figure 41

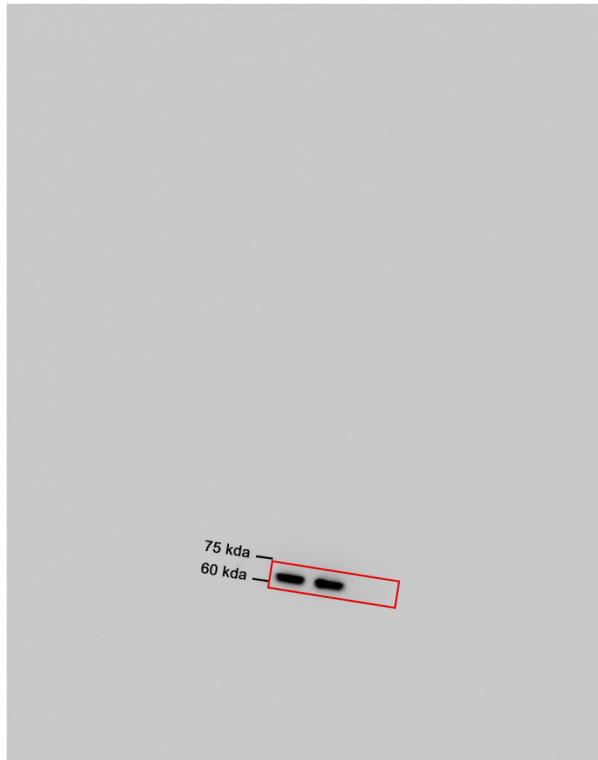

CPEB2

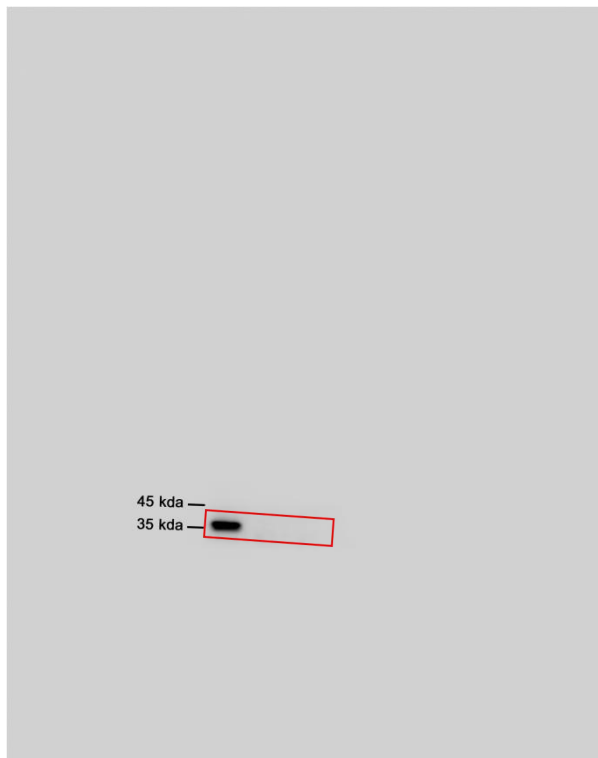

GAPDH

Figure 5a

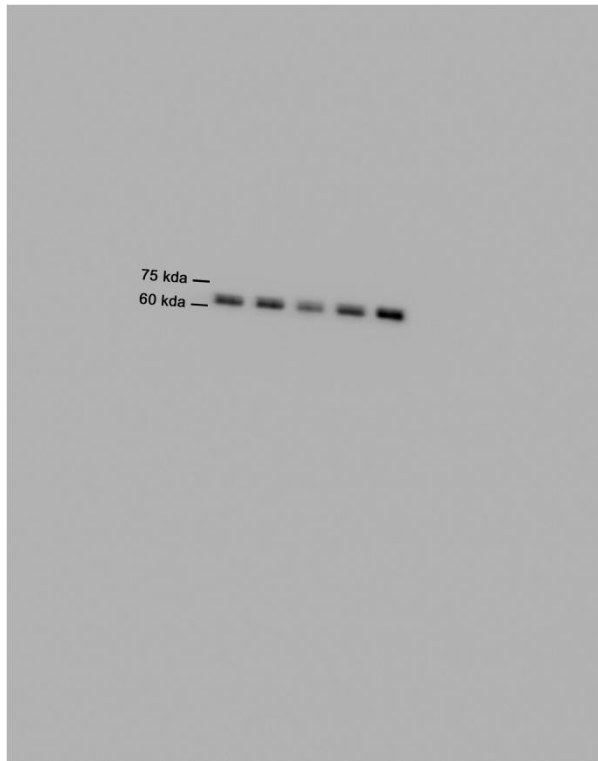

SRSF5

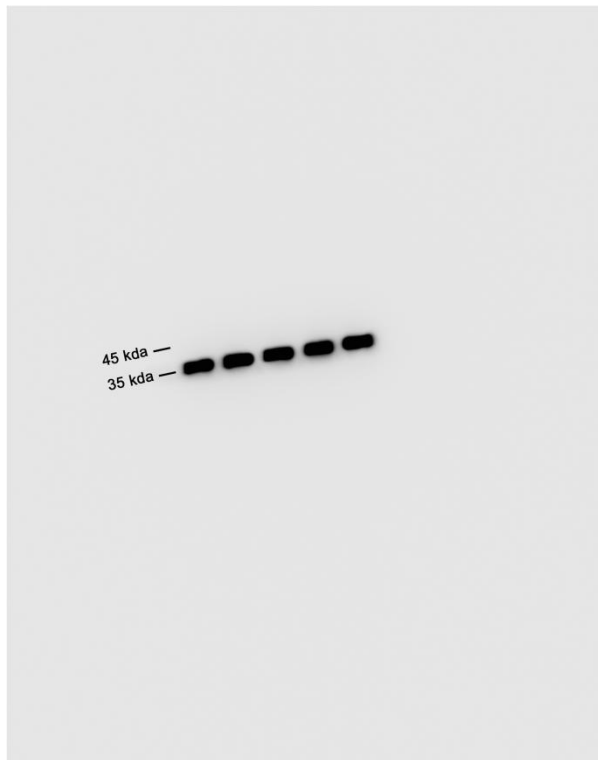

GAPDH

Figure 5d

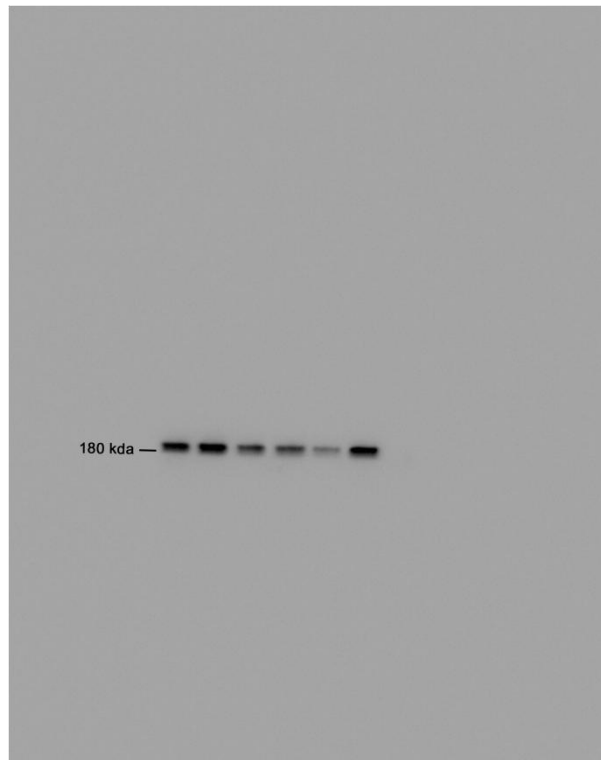

ZO-1

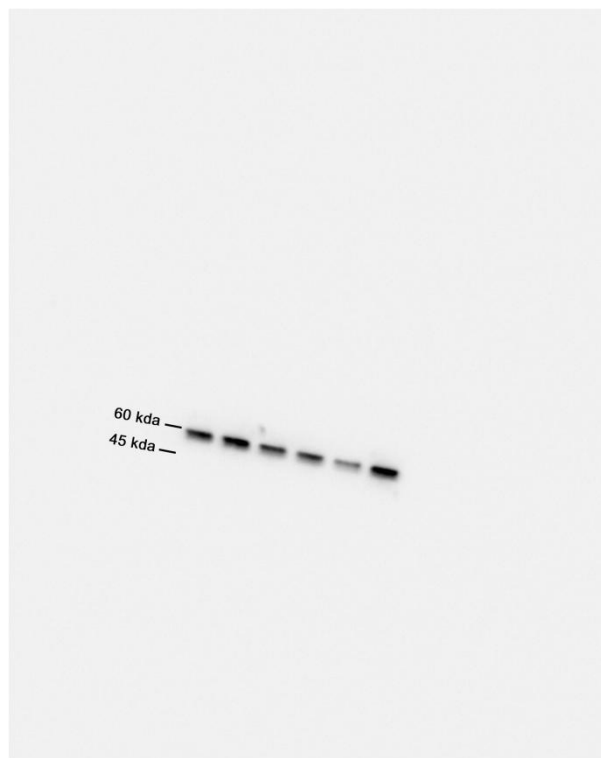

occludin



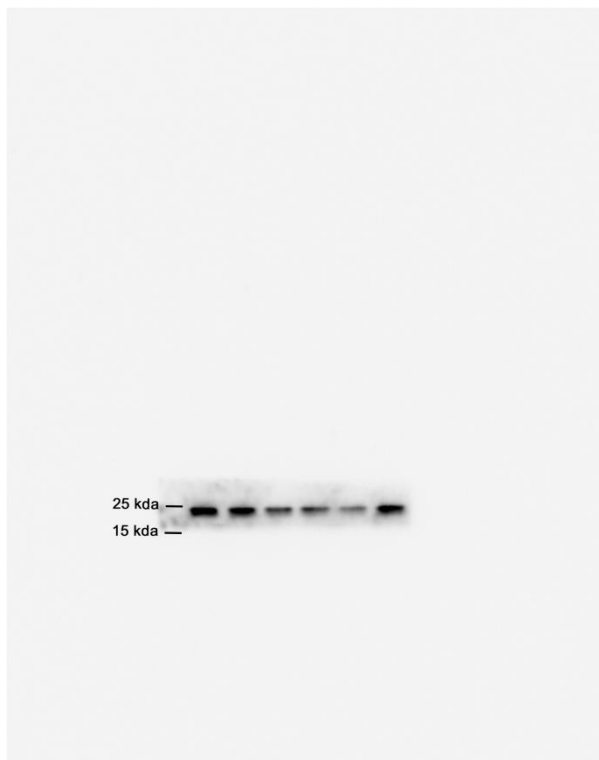

claudin-5

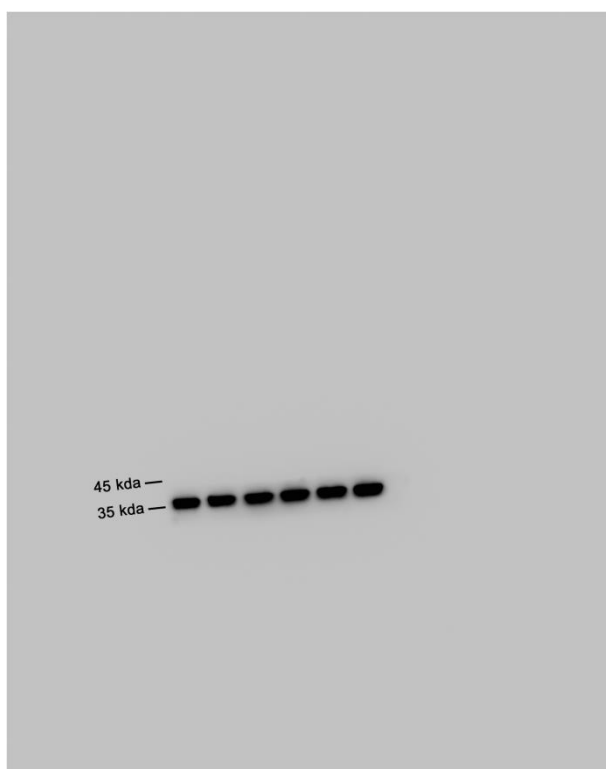

GAPDH

Figure 6f

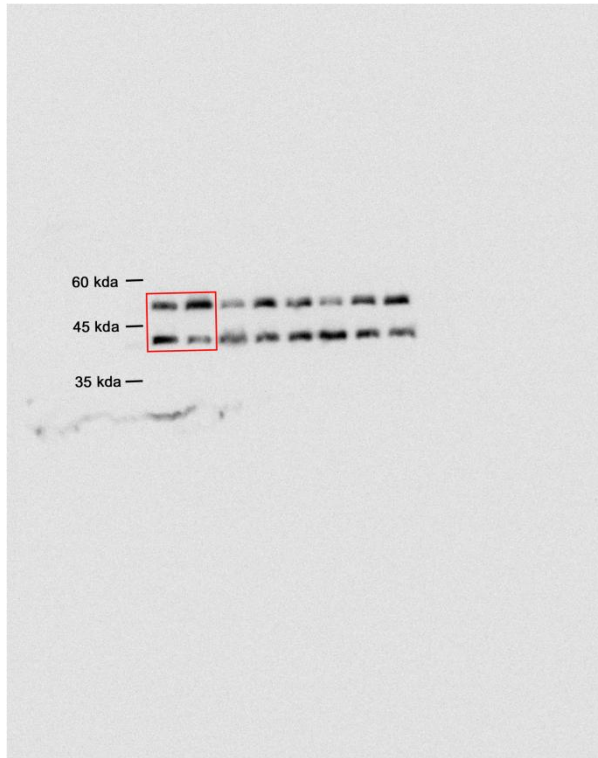

ETS1

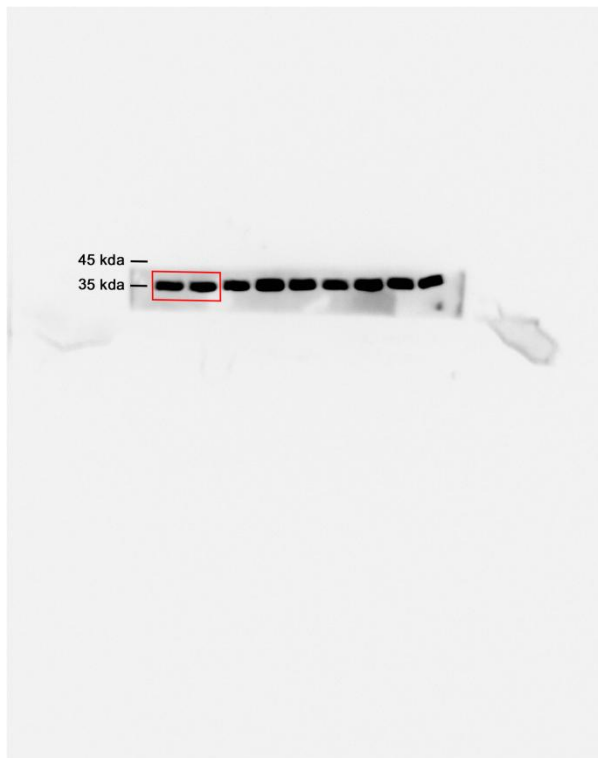

GAPDH

Figure 6m

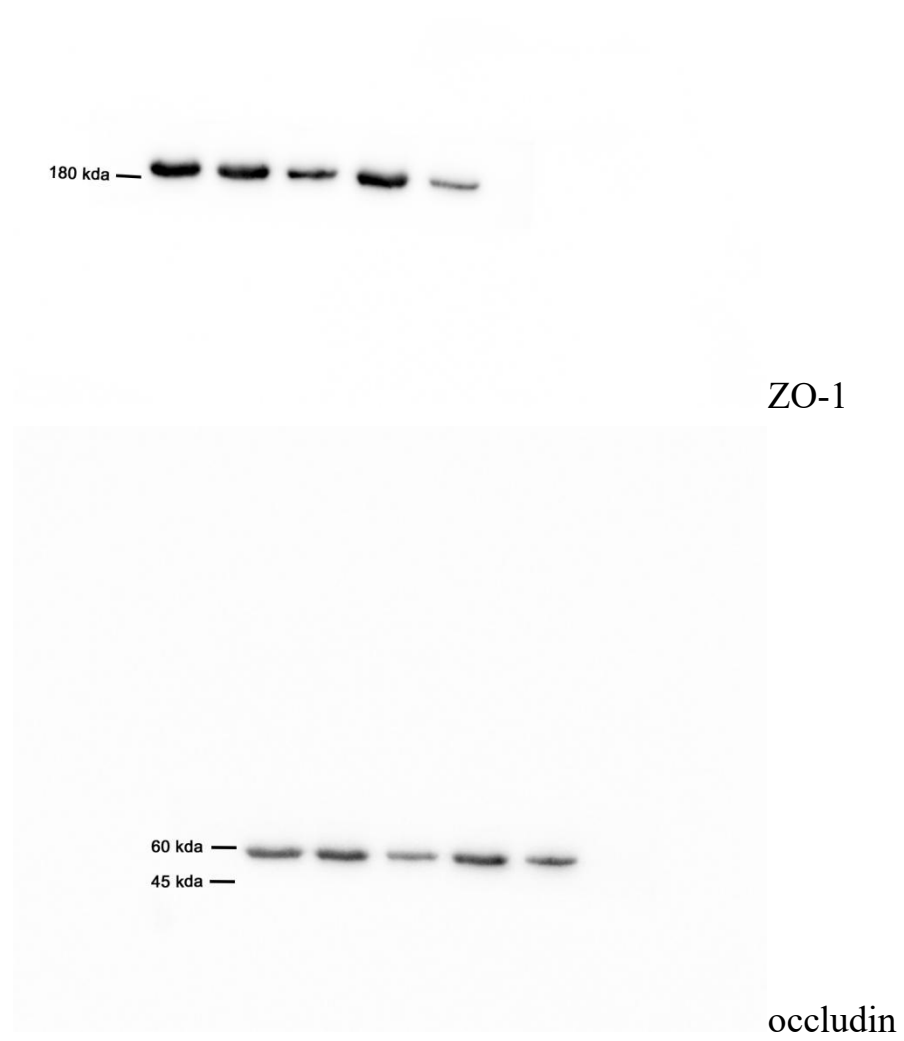

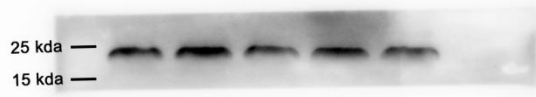

claudin-5

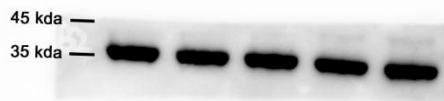

GAPDH

Figure 7c

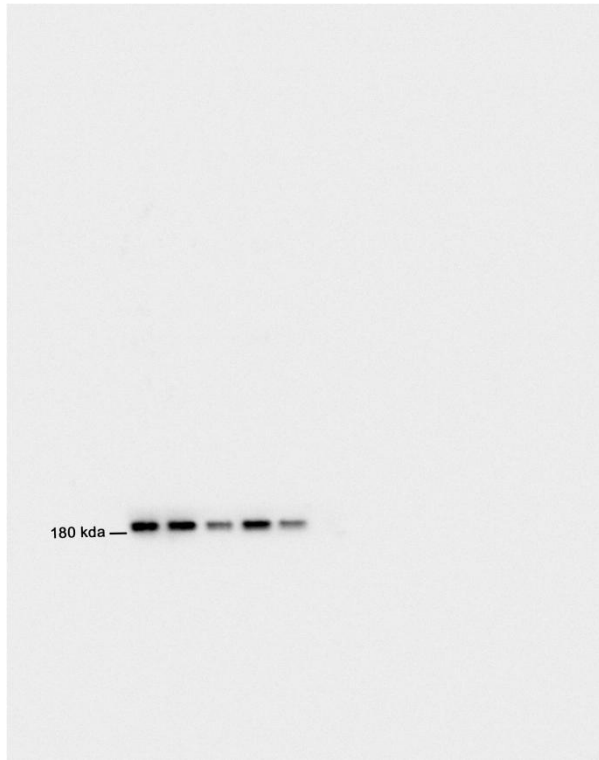

ZO-1

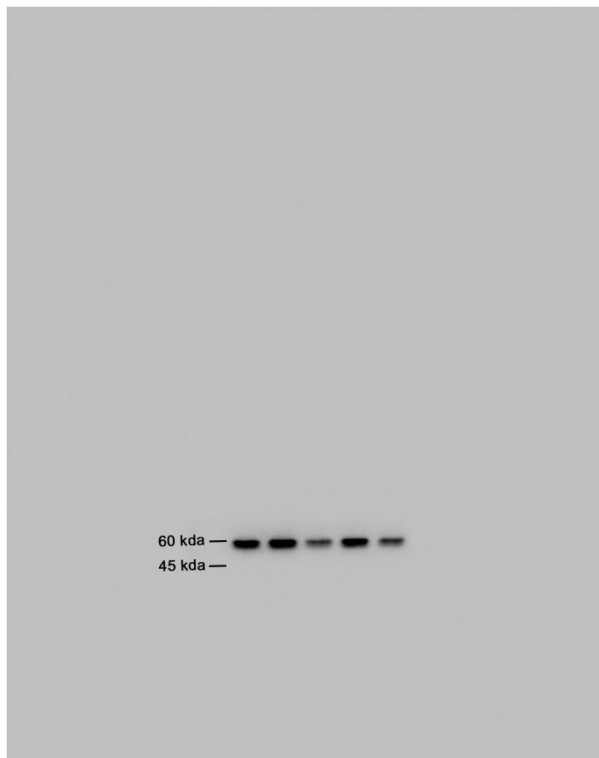

occludin

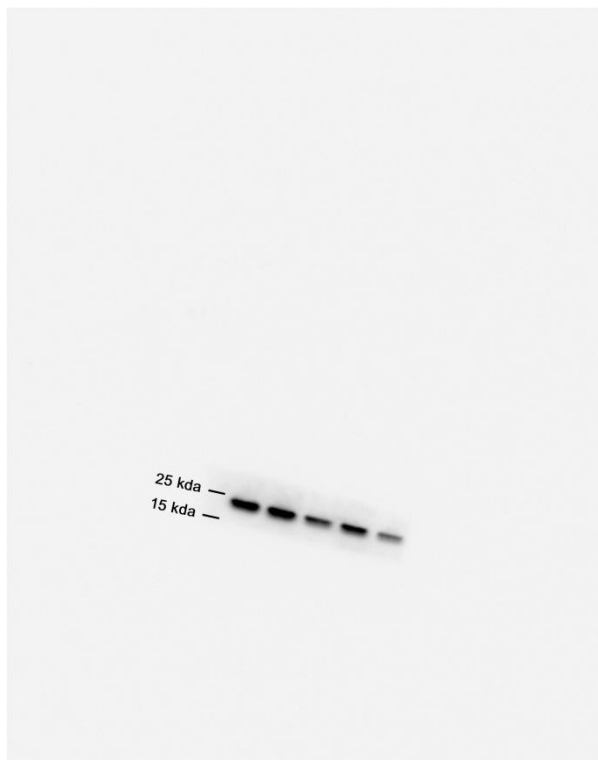

claudin-5

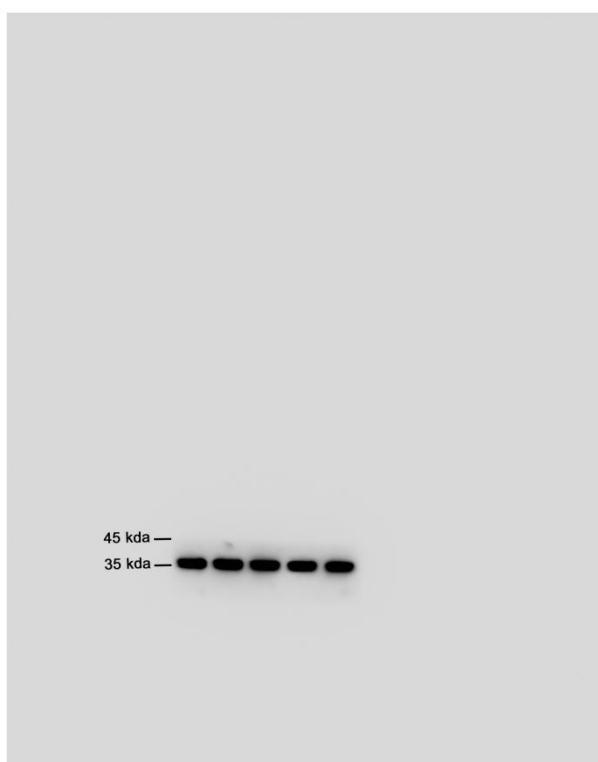

GAPDH

Figure S1b

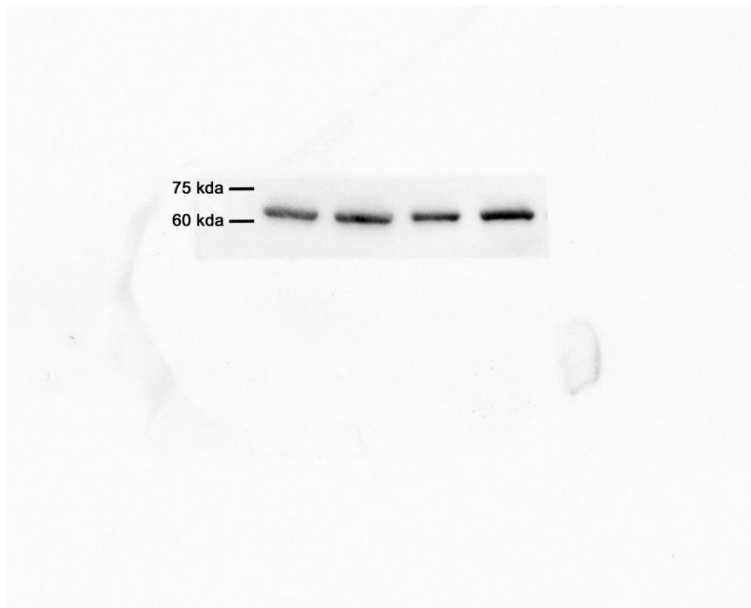

METTL3

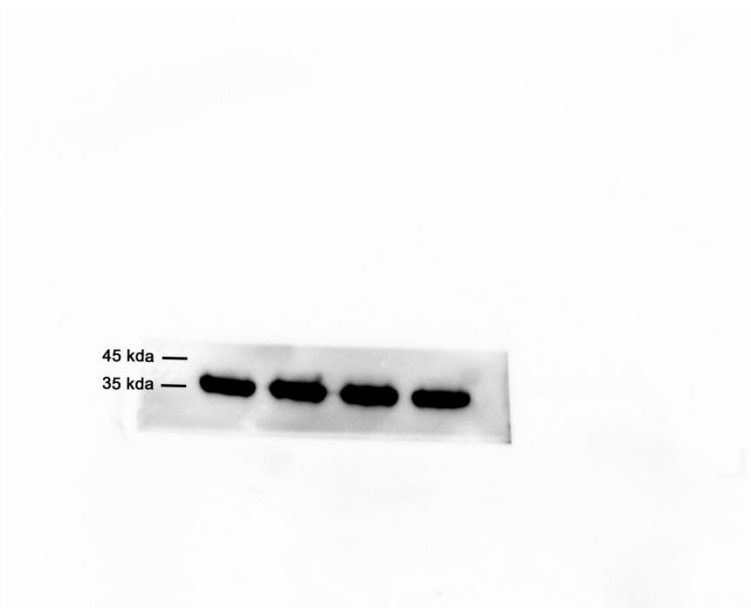

GAPDH

Figure S2a

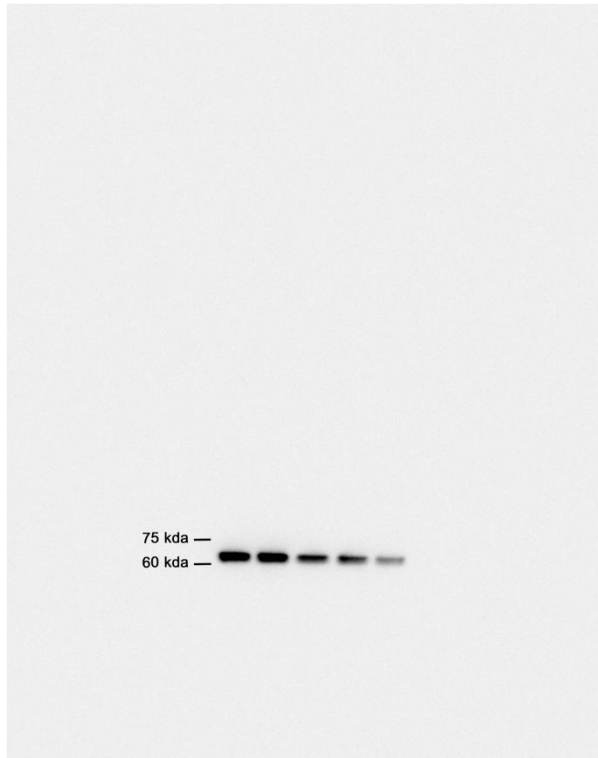

METTL3

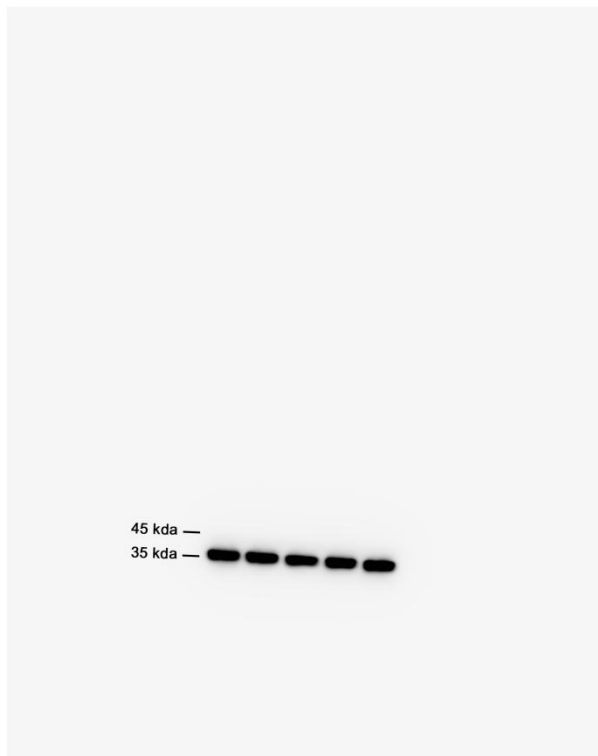

GAPDH



Figure S2b

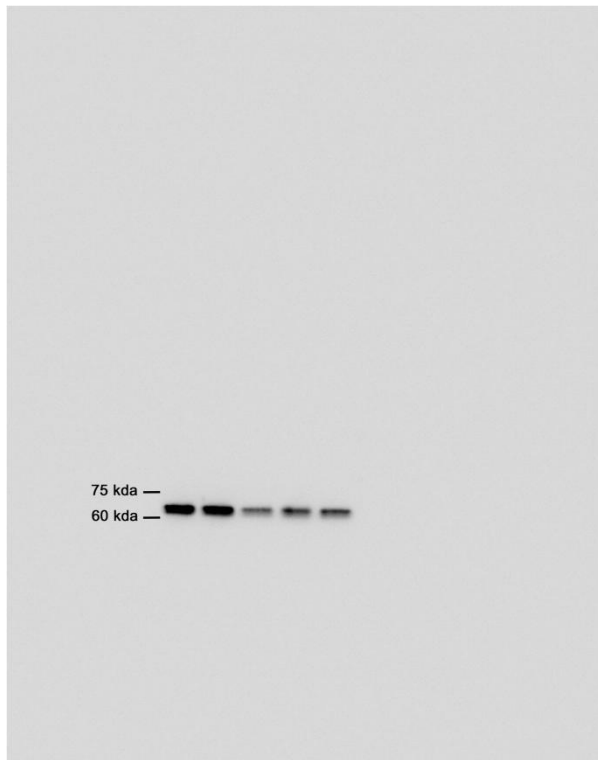

IGF2BP3

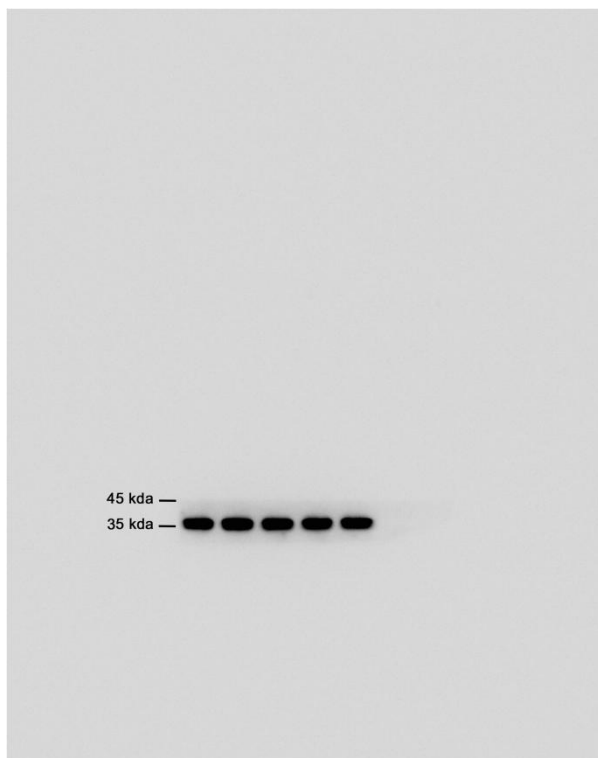

GAPDH

Figure S2c

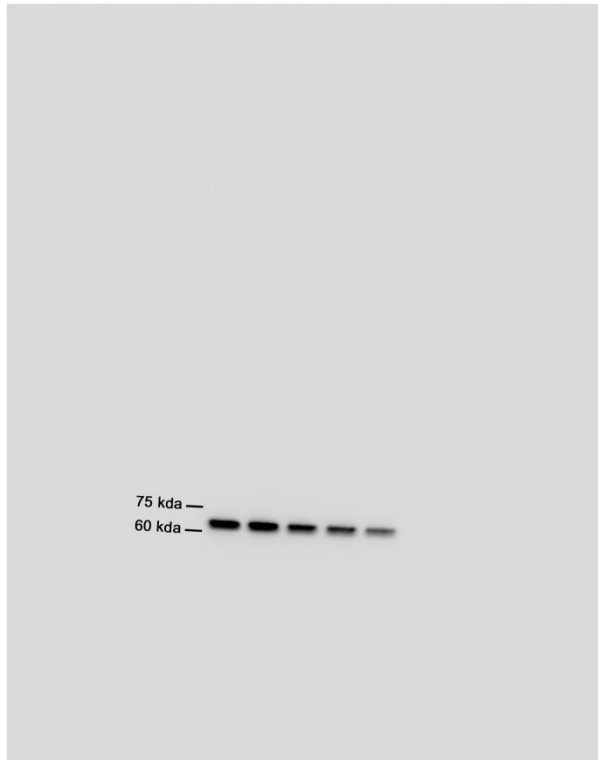

CPEB2

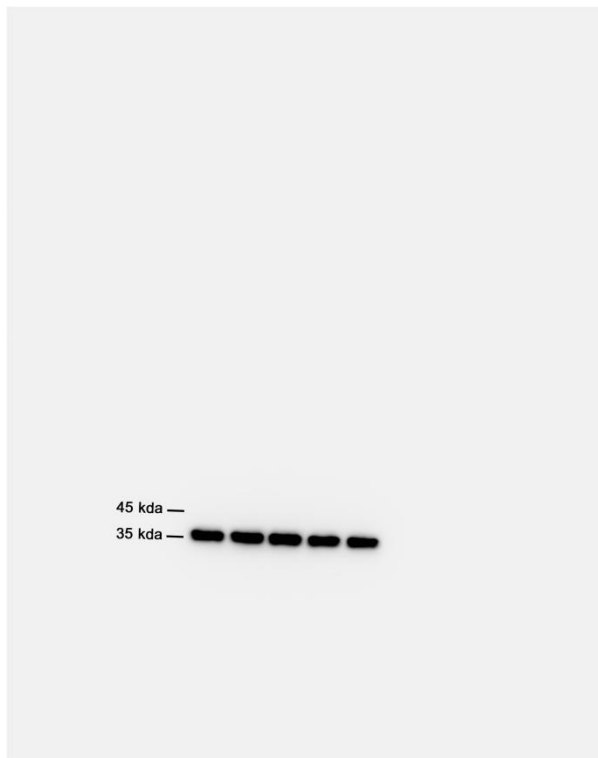

GAPDH

Figure S2d

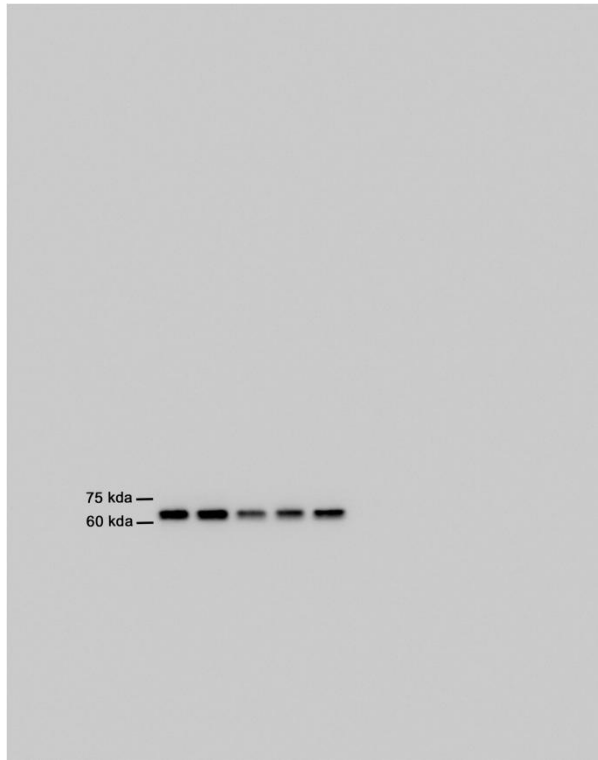

SRSF5

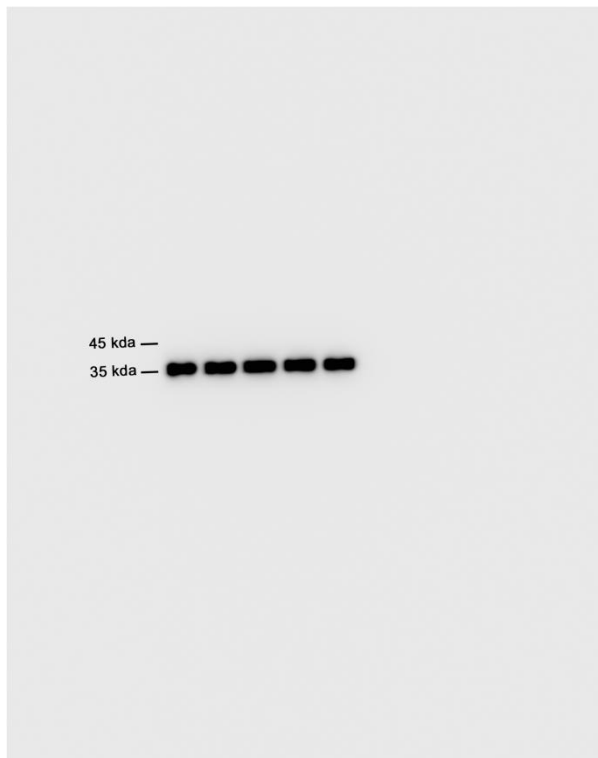

GAPDH

Figure S2e

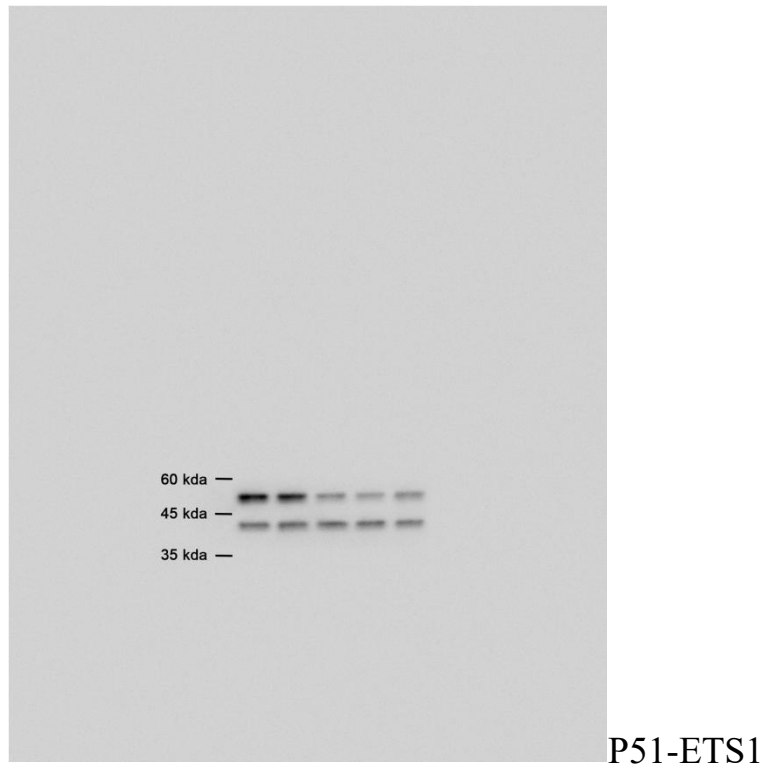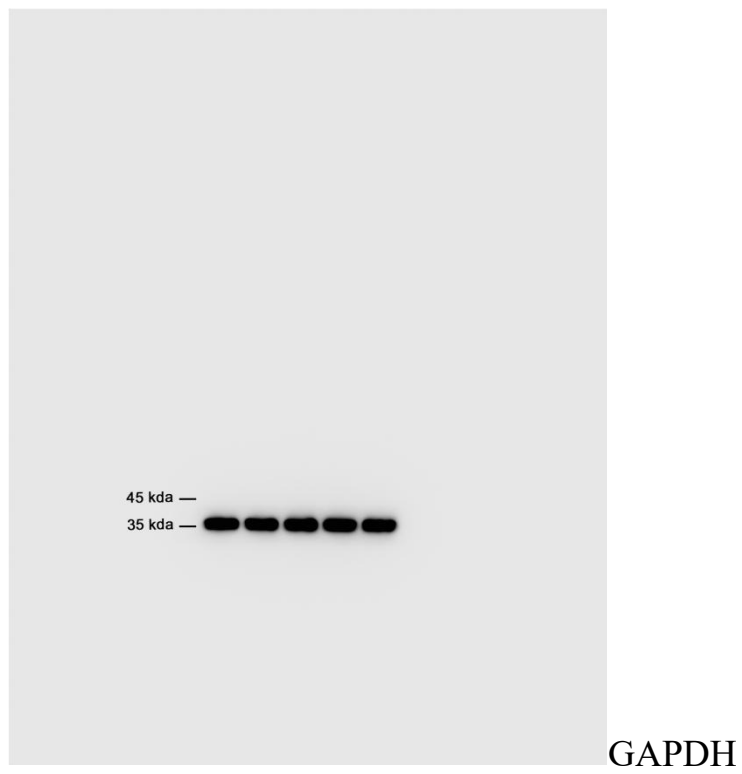

Supplement: 42003_2022_3878_MOESM1_ESM.pdf [file 42003_2022_3878_MOESM1_ESM.pdf]
