# Supplementary material for: CPEB2 m6A methylation regulates blood–tumor barrier permeability by regulating splicing factor SRSF5 stability
Source: PubMed Central journal article supplement (PMC9445078; doi:10.1038/s42003-022-03878-9), 2022-09-05
Supplement: 42003_2022_3878_MOESM2_ESM.pdf [file 42003_2022_3878_MOESM2_ESM.pdf]

## Description of Additional Supplementary Files

**File name:** Supplementary Data 1

**Description:** The numerical data that make up the all graphs in the paper.
